# Supplementary material
Source: PubMed Central journal article supplement (PMC7594379)
Supplement: advancesADV2020002963C-suppl2.pdf [file advancesADV2020002963C-suppl2.pdf]

## Supplemental File 5: Study Characteristics Tables

### Contents

|                                                                                                                                                                                                                                       |    |
|---------------------------------------------------------------------------------------------------------------------------------------------------------------------------------------------------------------------------------------|----|
| Supplemental File 5: Study Characteristics Tables.....                                                                                                                                                                                | 1  |
| 3.1.a. Heparin discontinuation vs parenteral non-heparin anticoagulant.....                                                                                                                                                           | 2  |
| 3.1.b. DOAC vs DOAC.....                                                                                                                                                                                                              | 10 |
| 3.2 Therapeutic vs prophylactic dosing.....                                                                                                                                                                                           | 13 |
| 3.3 DOAC vs DOAC plus platelets.....                                                                                                                                                                                                  | 14 |
| 3.4: IVC filter.....                                                                                                                                                                                                                  | 15 |
| 3.5 Oral anticoagulation (VKA) be initiated before platelet recovery.....                                                                                                                                                             | 16 |
| 3.6 Platelet vs no platelet.....                                                                                                                                                                                                      | 18 |
| 3.7.a & 3.7.b. Ultrasonography and ultrasonography for persons with central venous catheter.....                                                                                                                                      | 20 |
| 3.8 Continue anticoagulation until platelet recovery or for 4-6 weeks or for 3 months in patients with isolated HIT.....                                                                                                              | 22 |
| 3.9 VKA vs DOAC.....                                                                                                                                                                                                                  | 23 |
| 4.1 Anticoagulation with a non-heparin anticoagulant or preoperative plasma exchange with heparin or heparin with an antiplatelet agent for patients with acute HIT or subacute HIT who require urgent cardiovascular surgery.....    | 24 |
| 4.2 Anticoagulation with a non-heparin anticoagulant or preoperative plasma exchange with heparin or heparin with an antiplatelet agent for patients with subacute HIT B or remote HIT who require urgent cardiovascular surgery..... | 29 |
| 5.1 Anticoagulation with a non-heparin anticoagulant for patients with acute HIT or subacute HIT A who require urgent percutaneous cardiovascular interventions.....                                                                  | 33 |
| 5.2 Anticoagulation with a non-heparin anticoagulant or unfractionated heparin for patients with subacute HIT B or remote HIT who require urgent percutaneous cardiovascular interventions.....                                       | 35 |
| 6.1 & 6.2 Renal replacement therapy for acute HIT, subacute HIT or remote HIT.....                                                                                                                                                    | 40 |
| 7. VTE prophylaxis in patients with Remote HIT.....                                                                                                                                                                                   | 51 |
| 8.1. & 8.2. Emergency identification for persons with HIT.....                                                                                                                                                                        | 52 |

### 3.1.a. Heparin discontinuation vs parenteral non-heparin anticoagulant

1. Linkins L-A, Dans AL, Moores LK, Bona R, Davidson BL, Schulman S, et al. Treatment and prevention of heparin-induced thrombocytopenia: antithrombotic therapy and prevention of thrombosis: American College of Chest Physicians evidence-based clinical practice guidelines. *CHEST Journal*. 2012;141(2\_suppl):e495S-e530S.
2. Warkentin TE, Kelton JG. A 14-year study of heparin-induced thrombocytopenia. *The American journal of medicine*. 1996;101(5):502-7.
3. Chong B, Gallus A, Cade J, Magnani H, Manoharan A, Oldmeadow M, et al. Prospective Randomised Open-label Comparison of Danaparoid with Dextran 70 in the Treatment of Heparin-induced Thrombocytopenia with Thrombosis A Clinical Outcome Study. *Thrombosis and haemostasis*. 2001;86(5):1170-5.
4. Lubenow N, Eichler P, Fau - Lietz T, Lietz T, Fau - Greinacher A, Greinacher A. Lepirudin in patients with heparin-induced thrombocytopenia - results of the third prospective study (HAT-3) and a combined analysis of HAT-1, HAT-2, and HAT-3. (1538-7933 (Print)).
5. Lewis BE, Wallis DE, Berkowitz SD, Matthai WH, Fareed J, Walenga JM, et al. Argatroban anticoagulant therapy in patients with heparin-induced thrombocytopenia. *Circulation*. 2001;103(14):1838-43.
6. Lewis BE, Wallis DE, Leya F, Hursting MJ, Kelton JG. Argatroban anticoagulation in patients with heparin-induced thrombocytopenia. *Archives of Internal Medicine*. 2003;163(15):1849-56.
7. Kang M, Alahmadi M, Sawh S, Kovacs MJ, Lazo-Langner A. Fondaparinux versus argatroban and danaparoid for the treatment of suspected or confirmed heparin-induced thrombocytopenia: A propensity score analysis. *Blood*. 2012;120(21):no pagination.
8. Al-Rossaies A, Alkharfy KM, Al-Ayoubi F, Al-Momen A. Heparin-induced thrombocytopenia: Comparison between response to fondaparinux and lepirudin. *International Journal of Clinical Pharmacy*. 2011;33(6):997-1001.
9. Magnani HN, Gallus A. Heparin-induced thrombocytopenia (HIT). A report of 1,478 clinical outcomes of patients treated with danaparoid (Orgaran) from 1982 to mid-2004. *Thrombosis and Haemostasis*. 2006;95(6):967-81.
10. Joseph L, Casanegra AI, Dhariwal M, Smith MA, Raju MG, Militello MA, et al. Bivalirudin for the treatment of patients with confirmed or suspected heparin-induced thrombocytopenia. *Journal of Thrombosis and Haemostasis*. 2014;12(7):1044-53.
11. Al-Eidan FAS, Alrawkan S, Alshammary H, Crowther MA. Comparison of argatroban and fondaparinux for the management of patients with isolated heparin-induced thrombocytopenia. *Annals of Hematology*. 2018;97(11):2055-9.
12. Bethea BT, Elliot JW, Richardson JB, Ahmed MI. Treatment of pulmonary embolism with argatroban and ultrasound-assisted catheter-directed thrombolysis with alteplase in a patient with heparin-induced thrombocytopenia. *American Journal of Health-System Pharmacy*. 2017;74(15):1153-7.
13. Ong SY, Chin YA, Than H, Tan CW, Yap ES, Wong WH, et al. Rivaroxaban for heparin-induced thrombocytopenia: adding to the evidence. *Annals of Hematology*. 2017;96(3):525-7.
14. Davis KA, Davis DO. Direct acting oral anticoagulants for the treatment of suspected heparin-induced thrombocytopenia. *European Journal of Haematology*. 2017;99(4):332-5.

15. Rouge A, Pelen F, Durand M, Schwebel C. Argatroban for an alternative anticoagulant in HIT during ECMO. *Journal of Intensive Care*. 2017;5(1):39.
16. Ezekwudo DE, Chacko R, Gbadamosi B, Batool S, Gaikazian S, Warkentin TE, et al. Apixaban for treatment of confirmed heparin-induced thrombocytopenia: A case report and review of literature. *Experimental Hematology and Oncology*. 2017;6(1):21.
17. Fraielli K, Patel D, Wang D, Sargent K, Gore J. Successful use of fondaparinux in the setting of heparin-induced thrombocytopenia with thrombosis confirmed by serotonin-release assay and Factor V Leiden. *Journal of Clinical Pharmacy and Therapeutics*. 2019.
18. Gleichgerrcht E, Lim MY, Turan TN. Cerebral Venous Sinus Thrombosis Due to Low-molecular-weight Heparin-induced Thrombocytopenia. *Neurologist*. 2017;22(6):241-4.
19. Gonzales M, Pipalia A, Weil A. Refractory Heparin-Induced Thrombocytopenia With Cerebral Venous Sinus Thrombosis Treated With IVIg, Steroids, and a Combination of Anticoagulants: A Case Report. *Journal of investigative medicine high impact case reports*. 2019;7:2324709619832324.
20. He Y, He H, Liu D, Long Y, Su L, Cheng W. Fondaparinux in a critically ill patient with heparin-induced thrombocytopenia: A case report. *Medicine (United States)*. 2018;97(37):e12236.
21. Ito K, Isogai T, Takada M, Tatsumi T, Enatsu K, Tanaka H, et al. Bilateral arm gangrene associated with heparin-induced thrombocytopenia after extracorporeal cardiopulmonary resuscitation. *Circulation Journal*. 2018;82(1):293-4.
22. Kunk PR, Brown J, McShane M, Palkimas S, Gail Macik B. Direct oral anticoagulants in hypercoagulable states. *Journal of Thrombosis and Thrombolysis*. 2017;43(1):79-85.
23. Samos M, Bolek T, Skornova I, Benko J, Stasko J, Kubisz P, et al. Apixaban: a novel agent to treat heparin induced thrombocytopenia and to prevent embolism in patient with atrial fibrillation after multiple valve replacement? *Journal of Thrombosis and Thrombolysis*. 2019.
24. Sin JH, Lopez ND. Argatroban for Heparin-Induced Thrombocytopenia during Venovenous Extracorporeal Membrane Oxygenation with Continuous Venovenous Hemofiltration. *The journal of extra-corporeal technology*. 2017;49(2):115-20.
25. Vavlukis M, Kotlar I, Taravari H, Poposka L, Kedev S. Can rivaroxaban be a drug of choice for treating heparin-induced thrombocytopenia in a patient with pulmonary thromboembolism? *Anatolian Journal of Cardiology*. 2017;18(1):77-9.
26. Topliceanu A, Breen T, Patel H, Yager N, Maceira E, Torosoff M. Bivalirudin fails to prevent atrial thrombus development in heparin-induced thrombocytopenia and thrombosis syndrome. *BMJ case reports*. 2018;2018.

### **Characteristics of included studies**

| Author/<br>Year  | Study Design         | Study population                                                                                                                                                                            | Treatment                                 | Procedure                       | Number of eligible patients in the study  | Patients have received a diagnosis of HIT based on--- ? | Laboratory test for diagnosis | For ELISA test only, was Optical Density cut-off or individual OD reported? Y/N; if Y, What was the OD reported? | Type of HIT (acute HIT, etc.) | Outcomes: Mortality, Thromboembolism, Limb Amputation, Major Bleeding, recurrence of HIT                   |
|------------------|----------------------|---------------------------------------------------------------------------------------------------------------------------------------------------------------------------------------------|-------------------------------------------|---------------------------------|-------------------------------------------|---------------------------------------------------------|-------------------------------|------------------------------------------------------------------------------------------------------------------|-------------------------------|------------------------------------------------------------------------------------------------------------|
| Al-Eidan 2018    | Retrospective Cohort | General HIT                                                                                                                                                                                 | 39 Fondaparinux, 56 Argatroban            | NA                              | 95                                        | ELISA results                                           | ELISA, CrCl                   | Yes $\geq$ 1.0 was considered positive                                                                           | Isolated HIT                  | Death, Major bleeding, Limb amputation, Thromboembolic complication (DVT, PE, DVT&PE, Arterial thrombosis) |
| Al-Rossaies 2011 | Retrospective Cohort | General HIT                                                                                                                                                                                 | Fondaparinux, lepirudin                   | NA                              | Fondaparinux (n = 5)<br>Lepirudin (n = 7) | Platelet count                                          | Immune assay test             | NR                                                                                                               | Acute HIT                     | Death not related to HIT, No recurrent thrombotic events                                                   |
| Bethea BT 2017   | Case Report          | Hypertrophic cardiomyopathy, coronary artery disease, hypertension, chronic diastolic heart failure, and atrial flutter and a large thrombus in the main and descending pulmonary arteries. | Argatroban, and converting to Rivaroxaban | Cardio-vascular catheterization | 1                                         | Reduced platelet count, 4Ts score                       | ELISA, SRA                    | Optical density ratio of 2.838 (a positive result is defined as an optical density ratio of $>1$ )               | HITT                          | Increasing size of thrombus                                                                                |

| Author/<br>Year | Study Design | Study population                                         | Treatment                            | Procedure       | Number of eligible patients in the study | Patients have received a diagnosis of HIT based on--- ? | Laboratory test for diagnosis                             | For ELISA test only, was Optical Density cut-off or individual OD reported? Y/N; if Y, What was the OD reported?                                                                                     | Type of HIT (acute HIT, etc.) | Outcomes: Mortality, Thromboembolism, Limb Amputation, Major Bleeding, recurrence of HIT                                                                                                                     |
|-----------------|--------------|----------------------------------------------------------|--------------------------------------|-----------------|------------------------------------------|---------------------------------------------------------|-----------------------------------------------------------|------------------------------------------------------------------------------------------------------------------------------------------------------------------------------------------------------|-------------------------------|--------------------------------------------------------------------------------------------------------------------------------------------------------------------------------------------------------------|
| Chong 2001      | RCT          | General HIT                                              | Danaparoid: 25, Dextran 70: 17       | NA              | 42                                       | Platelet count                                          | Immune assay test                                         | NR                                                                                                                                                                                                   | Acute HIT                     | New Thrombosis, Deaths, Major Bleeding, adverse events                                                                                                                                                       |
| Davis 2017      | Case Series  | General HIT (VTE prophylaxis, AF and Dialysis)           | apixaban, dabigatran, rivaroxaban.   | NA              | 12                                       | 4T score $\geq 4$                                       | positive IgG-specific anti-PF4/heparin complex assay, SRA | Mean OD using the anti- PF4 assay was 1.66 units (range 0.24-3.34 units) (Positive OD= $>0.4$ and $>50\%$ inhibition with heparin. Negative=OD $<0.4$ or $<5\%$ heparin inhibition considered normal |                               | Eleven patients continued DOAC following hospital discharge. One patient discontinued DOAC prior to discharge. No patients experienced thrombotic related event or major bleed while receiving DOAC therapy. |
| Ezekwudo 2017   | Case Report  | Endocarditis and Cardiac surgery                         | Argatroban and apixaban              | Cardiac surgery | 1                                        | Drop in Platelet count                                  | 4Ts score, ELISA. SRA                                     | positive value of 1.131 (OD)(negative reference range 0.000–0.399)                                                                                                                                   | HITT                          | no reported bleeding or thrombosis 3 months later.                                                                                                                                                           |
| Fraielli 2019   | Case Report  | Factor V Leiden undergo neurosurgery and post surgery PE | Argatroban, Fondaparinux to warfarin | NA              | 1                                        | Drop in Platelet count                                  | 4Ts score, SRA                                            | NR                                                                                                                                                                                                   | HITT                          | No bleeding nor new thrombotic complications were noted throughout the hos-                                                                                                                                  |

| Author/<br>Year     | Study Design         | Study population                       | Treatment                                                      | Procedure          | Number of eligible patients in the study | Patients have received a diagnosis of HIT based on--- ? | Laboratory test for diagnosis                      | For ELISA test only, was Optical Density cut-off or individual OD reported? Y/N; if Y, What was the OD reported? | Type of HIT (acute HIT, etc.)                               | Outcomes: Mortality, Thromboembolism, Limb Amputation, Major Bleeding, recurrence of HIT        |
|---------------------|----------------------|----------------------------------------|----------------------------------------------------------------|--------------------|------------------------------------------|---------------------------------------------------------|----------------------------------------------------|------------------------------------------------------------------------------------------------------------------|-------------------------------------------------------------|-------------------------------------------------------------------------------------------------|
| Gleichgerricht 2017 | Case Report          | Post surgery HIT plus ITP              | Argatroban, Warfarin and IVIG                                  | NA                 | 1                                        | Drop in Platelet count                                  | 4Ts score, ELISA, SRA                              | optical density of 3.032 absorbance units (normal<0.4OD)                                                         | HITII                                                       | Intracranial thrombosis, at the time of discharge all neurologic and cognitive problem resolved |
| Gonzales 2019       | Case Report          | Post mastectomy surgery HIT            | IVIG, Argatroban, bivalirudin, methylprednisolone and warfarin | NA                 | 1                                        | Drop in Platelet count                                  | 4Ts score, ELISA, SRA                              | (2.69 OD)                                                                                                        | HIT II                                                      | Discharged                                                                                      |
| He 2018             | Case Report          | General HIT                            | Fondaparinux, Argatroban                                       | Orthopedic surgery | 1                                        | Drop in Platelet count                                  | 4Ts score                                          | NR                                                                                                               | HIT II                                                      | Platelet recovery and no bleeding                                                               |
| Ito 2018            | Case Report          | ECMO and                               | Argatroban, Warfarin                                           | NA                 |                                          | Drop in Platelet count                                  | 4Ts score, anti-PF4/heparin enzyme immunoassays    |                                                                                                                  | HITT                                                        | 3 month FU normal Plt count,                                                                    |
| Joseph 2014         | Retrospective Cohort | critically ill, dialysis dependent.    | Bivalirudin                                                    | Dialysis           | 461                                      | Serologic testing for PF4-heparin antibodies, SRA, HIPA | Immunogenic assays utilized anti-PF4-heparin ELISA | Yes, $\geq 0.400$                                                                                                | Suspected 262, confirmed 124 and previous history of HIT 75 | Death all cause, , New thrombosis, amputation, Major bleeding,                                  |
| Kang 2015           | Retrospective Cohort | Adult men and nonpregnant, non-breast- | (fondaparinux 5 133, danaparoid 5 59, and                      | NA                 | 239                                      | 4T scores                                               | ELISA test, SRA                                    | NR                                                                                                               | Acute HIT                                                   | thrombosis or thrombosis-related death and major bleeding                                       |

| Author/<br>Year | Study Design       | Study population                                                         | Treatment                                                | Procedure                  | Number of eligible patients in the study | Patients have received a diagnosis of HIT based on--- ? | Laboratory test for diagnosis                              | For ELISA test only, was Optical Density cut-off or individual OD reported? Y/N; if Y, What was the OD reported? | Type of HIT (acute HIT, etc.)       | Outcomes: Mortality, Thromboembolism, Limb Amputation, Major Bleeding, recurrence of HIT |
|-----------------|--------------------|--------------------------------------------------------------------------|----------------------------------------------------------|----------------------------|------------------------------------------|---------------------------------------------------------|------------------------------------------------------------|------------------------------------------------------------------------------------------------------------------|-------------------------------------|------------------------------------------------------------------------------------------|
|                 |                    | feeding women who received a non-heparin anticoagulant for suspected HIT | argatroban 547)                                          |                            |                                          |                                                         |                                                            |                                                                                                                  |                                     |                                                                                          |
| Kunk 2017       | Case Series        | General HIT                                                              | Bivalirudin & Argatroban switch to Apixaban, Rivaroxaban | CABG, PE, DDVT prophylaxis | 12                                       | Thrombi(9), Thrombocytopenia (3)                        | ELISA and SRA                                              | NR                                                                                                               | Acute HIT and HITII                 | Severe bleeding, Recurrent thrombi                                                       |
| Lewis 2001      | Prospective Cohort | General HIT                                                              | Lepirudin                                                | NA                         | 138                                      | Platelet count                                          | Immune assay test                                          | NR                                                                                                               | isolated HIT                        | Limb Amputation , New Thrombosis, Major Bleeding                                         |
| Lewis 2003      | Prospective Cohort | General HIT                                                              | Lepirudin                                                | NA                         | 138                                      | Platelet count                                          | Immune assay test                                          | NR                                                                                                               | Acute HIT                           | Limb Amputation , New Thrombosis, Major Bleeding                                         |
| Lubenow 2005    | Prospective Cohort | General HIT                                                              | Lepirudin                                                | NA                         | 205                                      | HIPA test                                               | ELISA                                                      | NR                                                                                                               | Acute HIT                           | Death , New Thrombosis, Major Bleeding                                                   |
| Magnani 2006    | Cross-sectional    | General HIT, Renal failure patients                                      | Danaparoid                                               | Dialysis                   | 1,291 /1,478                             | Platelet count                                          | Immune assay test, platelet aggregation test (PAT, or HIPA | NR                                                                                                               | isolated HIT, Past HIT, Current HIT | Death all cause, New thromboses, Adverse events, Major bleeding, Amputation              |

| Author/<br>Year | Study Design | Study population                       | Treatment                                               | Procedure | Number of eligible patients in the study | Patients have received a diagnosis of HIT based on--- ? | Laboratory test for diagnosis                                                                                       | For ELISA test only, was Optical Density cut-off or individual OD reported? Y/N; if Y, What was the OD reported? | Type of HIT (acute HIT, etc.) | Outcomes: Mortality, Thromboembolism, Limb Amputation, Major Bleeding, recurrence of HIT |
|-----------------|--------------|----------------------------------------|---------------------------------------------------------|-----------|------------------------------------------|---------------------------------------------------------|---------------------------------------------------------------------------------------------------------------------|------------------------------------------------------------------------------------------------------------------|-------------------------------|------------------------------------------------------------------------------------------|
| Ong SY 2017     | Case Series  | Thromboembolic, (DVT, PE)              | Rivaroxaban                                             | NR        | 9                                        | 4Ts score 4 or more                                     | IgG-specific anti-PF4/heparin complex assay HPIA-IgG anti-PF4 kit (Diagnostic a Stago, France) or GTI-PF4 IgG ELISA | Mean OD reading using the anti-PF4/heparin assay was 2.34 OD units (range 1.13 to 3.21)                          | HIT                           | thrombosis, death or major bleeding                                                      |
| Rouge 2017      | Case Report  | Hemodynamic compromised requiring ECMO | Argatroban switch to Danaparoid and then changed to VKA | ECMO      | 2                                        | Drop in Platelet count                                  | anti-PF4 antibodies measured by ELISA (IgG) was 0.775 (.)                                                           | positivity threshold value at 0.146                                                                              | HIT II                        | One patient died                                                                         |
| Samos 2019      | Case Report  | Post cardiac surgery                   | Apixaban                                                | NA        | 1                                        | Drop in Platelet count                                  | rapid immunoanalysis, HITALert® flow cytometric analysis (HITALert assay,                                           | NR                                                                                                               | Acute HIT (Isolated)          | No bleeding, no thrombosis, 1-month FU in good condition                                 |
| Sin 2017        | Case Report  | ECMO                                   | Argatroban                                              | NA        | 1                                        | Drop in Platelet count                                  | ELISA, SRA                                                                                                          | (OD) of .146, OD of 1.392. On day 19, a third anti-PF4 was                                                       | HITT II                       | No thrombosis, no bleeding                                                               |



| Author/<br>Year  | Study Design | Study population     | Treatment                                                | Procedure                                                           | Number of eligible patients in the study | Patients have received a diagnosis of HIT based on--- ? | Laboratory test for diagnosis  | For ELISA test only, was Optical Density cut-off or individual OD reported? Y/N; if Y, What was the OD reported? | Type of HIT (acute HIT, etc.)                                         | Outcomes: Mortality, Thromboembolism, Limb Amputation, Major Bleeding, recurrence of HIT                                                                                                              |
|------------------|--------------|----------------------|----------------------------------------------------------|---------------------------------------------------------------------|------------------------------------------|---------------------------------------------------------|--------------------------------|------------------------------------------------------------------------------------------------------------------|-----------------------------------------------------------------------|-------------------------------------------------------------------------------------------------------------------------------------------------------------------------------------------------------|
|                  |              |                      |                                                          |                                                                     |                                          |                                                         |                                | also positive with an OD of 1.590                                                                                |                                                                       |                                                                                                                                                                                                       |
| Topliceanu, 2018 | Case Report  | post cardiac surgery | 1 patient received Bivalirudin and converted to Warfarin | Mitral valve repair, Tricuspid valve repair and ASD closure with AF | 1                                        | Platelet reduction                                      | ELISA heparin PF4 complex, SRA | optical density of 2.295 (normal <0.400)                                                                         | Acute HIT                                                             | A follow-up trans esophagus echo cardiography (TEE) performed approximately 2months later revealed, no LA thrombus. no embolic events during hospital stay and during the available 3-year follow-up. |
| Vavlukis 2017    | Case Report  | Pulmonary Emboli     | Rivaroxaban                                              | NA                                                                  | 1                                        | Drop in Platelet count                                  | 4Ts score, ELISA               | NR                                                                                                               | Subacute HIT A                                                        | rise in the PLT, thrombotic material resolution                                                                                                                                                       |
| Warkentin 2011   | Case Series  | Acute HIT            | Fondaparinux                                             | NA                                                                  | 16                                       | SRA                                                     | SRA                            | Optical density of 2.53 (normal <0.45 units)                                                                     | Acute HIT                                                             | New or recurrent thrombosis, bleeds, necrosis, amputation                                                                                                                                             |
| Warkentin 1996   | Case Series  | General HIT          | Heparin discontinued                                     | NA                                                                  | 127                                      | Platelet count                                          | Immune assay test              | NR                                                                                                               | with Thrombosis 65; with Isolated with Thrombosis Thrombocytopenia 62 | Death all cause, Death due to thrombosis, New Thrombosis                                                                                                                                              |

4Ts score is not a Lab test but some components defined based on the Lab Test

### 3.1.b. DOAC vs DOAC

1. Warkentin TE, Pai M, Linkins LA. Direct oral anticoagulants for treatment of HIT: update of Hamilton experience and literature review. *Blood*. 2017;130(9):1104-1113
2. Bethea BT, Elliot JW, Richardson JB, Ahmed MI. Treatment of pulmonary embolism with argatroban and ultrasound-assisted catheter-directed thrombolysis with alteplase in a patient with heparin-induced thrombocytopenia. *American Journal of Health-System Pharmacy*. 2017;74(15):1153-7.
3. Davis KA, Davis DO. Direct acting oral anticoagulants for the treatment of suspected heparin-induced thrombocytopenia. *European Journal of Haematology*. 2017;99(4):332-5.
4. Ezekwudo DE, Chacko R, Gbadamosi B, Batool S, Gaikazian S, Warkentin TE, et al. Apixaban for treatment of confirmed heparin-induced thrombocytopenia: A case report and review of literature. *Experimental Hematology and Oncology*. 2017;6(1):21.
5. Samos M, Bolek T, Skornova I, Benko J, Stasko J, Kubisz P, et al. Apixaban: a novel agent to treat heparin induced thrombocytopenia and to prevent embolism in patient with atrial fibrillation after multiple valve replacement? *Journal of Thrombosis and Thrombolysis*. 2019.
6. Vavlukis M, Kotlar I, Taravari H, Poposka L, Kedev S. Can rivaroxaban be a drug of choice for treating heparin-induced thrombocytopenia in a patient with pulmonary thromboembolism? *Anatolian Journal of Cardiology*. 2017;18(1):77-9.

### Characteristics of included studies

| Author/Year    | Study Design      | Study population                             | Treatment                                           | Procedure                       | Number of eligible patients in the study | Patients have received a diagnosis of HIT based on --- ?    | Laboratory test for diagnosis -                       | For ELISA test only, was Optical Density cut-off or individual OD reported? Y/N; if Y, What was the OD reported? | Type of HIT (acute HIT A etc) | Outcomes: Mortality, Thromboembolism, Limb Amputation, Major Bleeding, recurrence of HIT |
|----------------|-------------------|----------------------------------------------|-----------------------------------------------------|---------------------------------|------------------------------------------|-------------------------------------------------------------|-------------------------------------------------------|------------------------------------------------------------------------------------------------------------------|-------------------------------|------------------------------------------------------------------------------------------|
| Warkentin 2017 | prospective study | General HIT                                  | DOACs (rivaroxaban, apixaban, dabigatran, edoxaban) | NR                              | 46                                       | 4Ts score $\geq 4$ points; positive platelet factor 4 [PF4] | heparin immunoassay, positive serotonin-release assay | NR                                                                                                               | confirmed HIT; acute HIT      | New progressive, or recurrent thrombosis, major hemorrhage,                              |
| Bethea BT 2017 | Case Report       | Hypertrophic cardiomyopathy, coronary artery | Argatroban, and converting to Rivaroxaban           | Cardio-vascular catheterization | 1                                        | Reduced platelet count, 4Ts score                           | ELISA, SRA                                            | Optical density ratio of 2.838 (a positive result is defined as an optical density ratio of $>1$ )               | HITT                          | Increasing size of thrombus                                                              |

|               |             |                                                                                                                                                |                                   |                 |    |                        |                                                                           |                                                                                                                                                                                                          |                      |                                                                                                                                                                                                              |
|---------------|-------------|------------------------------------------------------------------------------------------------------------------------------------------------|-----------------------------------|-----------------|----|------------------------|---------------------------------------------------------------------------|----------------------------------------------------------------------------------------------------------------------------------------------------------------------------------------------------------|----------------------|--------------------------------------------------------------------------------------------------------------------------------------------------------------------------------------------------------------|
|               |             | disease, hypertension, chronic diastolic heart failure, and atrial flutter and a large thrombus in the main and descending pulmonary arteries. |                                   |                 |    |                        |                                                                           |                                                                                                                                                                                                          |                      |                                                                                                                                                                                                              |
| Davis 2017    | Case series | General HIT (VTE prophylaxis, AF and Dialysis)                                                                                                 | apixaban, dabigatran, rivaroxaban | NA              | 12 | 4T score $\geq 4$      | positive IgG-specific anti-PF4/heparin complex assay, SRA                 | Mean OD using the anti-PF4 assay was 1.66 units (range 0.24- 3.34 units) (Positive OD= $\geq 0.4$ and $>50\%$ inhibition with heparin. Negative=OD $<0.4$ or $<5\%$ heparin inhibition considered normal | Acute HIT            | Eleven patients continued DOAC following hospital discharge. One patient discontinued DOAC prior to discharge. No patients experienced thrombotic related event or major bleed while receiving DOAC therapy. |
| Ezekwudo 2017 | Case Report | Endocarditis and Cardiac surgery                                                                                                               | Argatroban and apixaban           | Cardiac surgery | 1  | Drop in Platelet count | 4Ts score, ELISA. SRA                                                     | positive value of 1.131 (OD)(negative reference range 0.000–0.399)                                                                                                                                       | HITT                 | no reported bleeding or thrombosis 3 months later.                                                                                                                                                           |
| Samos 2019    | Case report | Post cardiac surgery                                                                                                                           | Apixaban                          | NA              | 1  | Drop in Platelet count | rapid immunoanalysis, HITAlert® flow cytometric analysis (HITAlert assay, | NR                                                                                                                                                                                                       | Acute HIT (Isolated) | No bleeding, no thrombosis, 1-month FU in good condition                                                                                                                                                     |

|                  |                |                     |                 |    |   |                           |                     |    |                   |                                                       |
|------------------|----------------|---------------------|-----------------|----|---|---------------------------|---------------------|----|-------------------|-------------------------------------------------------|
| Vavlukis<br>2017 | Case<br>Report | Pulmonary<br>Emboli | Rivaroxaba<br>n | NA | 1 | Drop in<br>Platelet count | 4Ts score,<br>ELISA | NR | Subacute HIT<br>A | rise in the PLT,<br>thrombotic material<br>resolution |
|------------------|----------------|---------------------|-----------------|----|---|---------------------------|---------------------|----|-------------------|-------------------------------------------------------|

### 3.2 Therapeutic vs prophylactic dosing

1. Schindewolf M, Scheuermann J, Kroll H, et al. Application, tolerance and safety of fondaparinux therapy in a German hospital: a prospective single-centre experience. *Thrombosis Research*. 2012;129(1):17-21.
2. Greinacher A, Janssens U, Berg G, et al. Lepirudin (recombinant hirudin) for parenteral anticoagulation in patients with heparin-induced thrombocytopenia. *Circulation*. 1999;100(6):587-593.
3. Farner B, Eichler P, Kroll H, Greinacher A. A comparison of danaparoid and lepirudin in heparin-induced thrombocytopenia. *Thrombosis and Haemostasis*. 2001;85(6):950-957.

#### Characteristics of included studies

| Author/<br>Year  | Study Design                           | Study population | Treatment                       | Procedure | Number of eligible patients in the study | Patients have received a diagnosis of HIT based on --- ? | Laboratory test for diagnosis - | For ELISA test only, was Optical Density cut-off or individual OD reported? Y/N; if Y, What was the OD reported? | Type of HIT (acute HIT, | Outcomes: Mortality, Thromboembolism, Limb Amputation, Major Bleeding, recurrence of HIT |
|------------------|----------------------------------------|------------------|---------------------------------|-----------|------------------------------------------|----------------------------------------------------------|---------------------------------|------------------------------------------------------------------------------------------------------------------|-------------------------|------------------------------------------------------------------------------------------|
| Farner 2001      | Prospective trials                     | General HIT      | Danaparoid 126<br>Lepirudin 175 | NA        | 301                                      | Platelet count                                           | Immune assay test, HIPA         | NR                                                                                                               | Active HIT              | new thromboembolic complications (new TECs), amputations, death, and major bleeding      |
| Greinacher 1999  | 2 Cohorts                              | General HIT      | Lepirudin                       | NA        | 419                                      | Platelet count                                           | Immune assay test               | NR                                                                                                               | HITT                    | Death, Limp Amputation, New thrombosis, Major bleeding                                   |
| Schindewolf 2012 | prospective observational cohort study | General HIT      | Fondaparinux                    | NA        | 231                                      | Platelet count                                           | Immune assay test               | NR                                                                                                               | Acute HIT               | Death, Major bleeding, Adverse events                                                    |

### 3.3 DOAC vs DOAC plus platelets

1. Palatianos GM, Foroulis CN, Vassili MI, et al. Preoperative detection and management of immune heparin-induced thrombocytopenia in patients undergoing heart surgery with iloprost. *Journal of Thoracic and Cardiovascular Surgery*. 2004;127(2):548-554.
2. Palatianos G, Michalis A, Alivizatos P, et al. Perioperative use of iloprost in cardiac surgery patients diagnosed with heparin-induced thrombocytopenia-reactive antibodies or with true HIT (HIT-reactive antibodies plus thrombocytopenia): An 11-year experience. *American Journal of Hematology*. 2015;90(7):608-617.

#### Characteristics of included studies

| Author/<br>Year    | Study<br>Design                             | Study<br>population                                                                                           | Treatment                                  | Procedure          | Number of<br>eligible<br>patients in<br>the study | Patients have<br>received a<br>diagnosis of<br>HIT based on<br>--- ? | Laboratory<br>test for<br>diagnosis - | For ELISA test only, was<br>Optical Density cut-off<br>or individual OD<br>reported? Y/N; if Y,<br>What was the OD<br>reported? | Type of HIT<br>(acute HIT<br>etc) | Outcomes: Mortality,<br>Thromboembolism,<br>Limb Amputation,<br>Major Bleeding,<br>recurrence of HIT |
|--------------------|---------------------------------------------|---------------------------------------------------------------------------------------------------------------|--------------------------------------------|--------------------|---------------------------------------------------|----------------------------------------------------------------------|---------------------------------------|---------------------------------------------------------------------------------------------------------------------------------|-----------------------------------|------------------------------------------------------------------------------------------------------|
| Palatianos<br>2004 | Longit<br>udinal<br>data                    | Patients<br>with<br>immune<br>heparin-<br>induced<br>thrombocyt<br>openia<br>undergoing<br>cardiac<br>surgery | Iloprost                                   | cardiac<br>surgery | 32/1518                                           | Platelet count                                                       | Immune<br>assay test                  | NR                                                                                                                              | HITT                              | Mortality, Major<br>Bleeding,                                                                        |
| Palatianos<br>2015 | Longit<br>udinal<br>data<br>for 11<br>years | cardiac<br>surgery<br>patients<br>with HIT                                                                    | Iloprost<br>(n=110)<br>Controls<br>(n=118) | cardiac<br>surgery | 228                                               | Platelet count                                                       | Immune<br>assay test                  | OD <0.300                                                                                                                       | Acute HIT                         | Adverse events, 30-<br>Day mortality,<br>Thromboembolism,<br>Bleeding                                |

### 3.4: IVC filter

1. Hong AP, Cook DJ, Sigouin CS, Warkentin TE. Central venous catheters and upper-extremity deep-vein thrombosis complicating immune heparin-induced thrombocytopenia. *Blood*. 2003;101(8):3049-3051.
2. Jung M, McCarthy J, Baker K, Rice L. Risks of IVC filters in the setting of heparin-induced thrombocytopenia. *Journal of Thrombosis and Haemostasis*. 2011;9:334.

#### Characteristics of included studies

| Author/Year | Study Design                      | Study population                                                             | Treatment                          | Procedure                                                                                                                             | Number of eligible patients in the study                 | Patients have received a diagnosis of HIT based on--- ? | Laboratory test for diagnosis -            | For ELISA test only, was Optical Density cut-off or individual OD reported? Y/N; if Y, What was the OD reported? | Type of HIT (acute HIT A,   | Outcomes: Mortality, Thromboembolism, Limb Amputation, Major Bleeding, recurrence of HIT                    |
|-------------|-----------------------------------|------------------------------------------------------------------------------|------------------------------------|---------------------------------------------------------------------------------------------------------------------------------------|----------------------------------------------------------|---------------------------------------------------------|--------------------------------------------|------------------------------------------------------------------------------------------------------------------|-----------------------------|-------------------------------------------------------------------------------------------------------------|
| Hong 2003   | Reviewed consecutive cases        | HIT patients with central venous catheter (CVC)                              | CVC use                            | 145 had a CVC placed during the 2-week period prior to the episode of HIT. The remaining 115 patients with HIT did not receive a CVC. | <b>260</b>                                               | Platelet count                                          | 14C-serotonin release assay                | NR                                                                                                               | serologically confirmed HIT | upper- and lower-extremity DVTs                                                                             |
| Jung 2011   | case report and data chart review | A 69-year-old woman with breast cancer and HIT, A 48-year-old woman with HIT | IVC filter and Warfarin, Lepirudin | NA                                                                                                                                    | 2 cases had IVC filter, 9/56 HIT patients had IVC filter | Platelet count                                          | immunoassay test (ELISA, PaGIA, PAT, etc.) | NR                                                                                                               | Acute HIT                   | Limb gangrene, subsequent thromboses: caval thrombosis up to the filter (1), recurrent PE (1), or both (1). |

### 3.5 Oral anticoagulation (VKA) be initiated before platelet recovery

1. Warkentin TE, Elavathil LJ, Hayward CP, Johnston MA, Russett JI, Kelton JG. The pathogenesis of venous limb gangrene associated with heparin-induced thrombocytopenia. *Annals of internal medicine*. 1997;127(9):804-812.
2. Warkentin TE, Kelton JG. A 14-year study of heparin-induced thrombocytopenia. *The American journal of medicine*. 1996;101(5):502-507.
3. Srinivasan AF, Rice L, Bartholomew JR, et al. Warfarin-induced skin necrosis and venous limb gangrene in the setting of heparin-induced thrombocytopenia. *Archives of internal medicine*. 2004;164(1):66-70.

#### Characteristics of included studies

| Author/<br>Year    | Study<br>Design                             | Study<br>population                                                                                                              | Treatment                            | Procedure                                                          | Number of<br>eligible<br>patients in<br>the study | Patients have<br>received a<br>diagnosis of<br>HIT based on-<br>--- ? | Laboratory<br>test for<br>diagnosis -        | For ELISA test only, was<br>Optical Density cut-off<br>or individual OD<br>reported? Y/N; if Y,<br>What was the OD<br>reported? | Type of HIT<br>(acute HIT A,               | Outcomes: Mortality,<br>Thromboembolism,<br>Limb Amputation,<br>Major Bleeding,<br>recurrence of HIT |
|--------------------|---------------------------------------------|----------------------------------------------------------------------------------------------------------------------------------|--------------------------------------|--------------------------------------------------------------------|---------------------------------------------------|-----------------------------------------------------------------------|----------------------------------------------|---------------------------------------------------------------------------------------------------------------------------------|--------------------------------------------|------------------------------------------------------------------------------------------------------|
| Srinivasan<br>2004 | Case<br>reports                             | HIT<br>patients                                                                                                                  | Warfarin,<br>Lepirudin,<br>Vitamin K | NA                                                                 | 6                                                 | Platelet count                                                        | Enzyme-<br>linked<br>immunosor<br>bent assay | NR                                                                                                                              | Acute HIT                                  | Skin necrosis, Venous<br>Limb Gangrene, Leg<br>and breast<br>amputations, Death                      |
| Warkentin<br>1996  | Single<br>arm<br>observ<br>ational<br>study | Isolated HIT                                                                                                                     | Warfarin                             | Discontin<br>ue<br>heparin<br>and<br>replacing<br>with<br>warfarin | 57                                                | Platelet count                                                        | C serotonin<br>release<br>assay              | NA                                                                                                                              | Isolated HIT                               | DVT, PE, Arterial<br>thrombosis, Sudden<br>death,                                                    |
| Warkentin<br>1997  | case<br>control<br>studies                  | patients<br>with<br>venous<br>limb<br>gangrene ( <i>n</i><br>= 8),<br>limb<br>arterial<br>thrombosis<br>( <i>n</i> = 10),<br>and | vitamin K,<br>Warfarin               | Discontin<br>ue<br>heparin<br>and<br>replacing<br>with<br>warfarin | 158                                               | Platelet count                                                        | Enzyme-<br>linked<br>immunosor<br>bent assay | NR                                                                                                                              | serologically<br>confirmed HIT<br>patients | Limb amputation                                                                                      |



| Author/<br>Year | Study<br>Design | Study<br>population                                             | Treatment | Procedure | Number of<br>eligible<br>patients in<br>the study | Patients have<br>received a<br>diagnosis of<br>HIT based on-<br>--- ? | Laboratory<br>test for<br>diagnosis - | For ELISA test only, was<br>Optical Density cut-off<br>or individual OD<br>reported? Y/N; if Y,<br>What was the OD<br>reported? | Type of HIT<br>(acute HIT A, | Outcomes: Mortality,<br>Thromboembolism,<br>Limb Amputation,<br>Major Bleeding,<br>recurrence of HIT |
|-----------------|-----------------|-----------------------------------------------------------------|-----------|-----------|---------------------------------------------------|-----------------------------------------------------------------------|---------------------------------------|---------------------------------------------------------------------------------------------------------------------------------|------------------------------|------------------------------------------------------------------------------------------------------|
|                 |                 | uncomplicated deep<br>venous<br>thrombosis<br>( <i>n</i> = 58). |           |           |                                                   |                                                                       |                                       |                                                                                                                                 |                              |                                                                                                      |

### 3.6 Platelet vs no platelet

1. Goel R, Ness PM, Takemoto CM, Krishnamurti L, King KE, Tobian AA. Platelet transfusions in platelet consumptive disorders are associated with arterial thrombosis and in-hospital mortality. *Blood*. 2015;125(9):1470-1476.
2. Hopkins CK, Goldfinger D. Platelet transfusions in heparin-induced thrombocytopenia: a report of four cases and review of the literature. *Transfusion*. 2008;48(10):2128-2132.
3. Refaai M, Chuang C, Menegus M, Blumberg N, Francis C. Outcomes after platelet transfusion in patients with heparin-induced thrombocytopenia. *Journal of Thrombosis and Haemostasis*. 2010;8(6):1419-1421.
4. Senzel L, Coldren D. Negative Heparin-Induced Thrombocytopenia Test Result After Massive Transfusion: Believe It or Not? *American journal of clinical pathology*. 2016;145(5):717-719.

#### Characteristics of included studies

| Author/<br>Year | Study<br>Design             | Study<br>population                                 | Treatment                | Procedure                                   | Number of<br>eligible<br>patients in<br>the study | Patients have<br>received a<br>diagnosis of<br>HIT based on-<br>--- ? | Laboratory<br>test for<br>diagnosis -                                           | For ELISA test<br>only, was Optical<br>Density cut-off<br>or individual OD<br>reported? Y/N; if<br>Y, What was the<br>OD reported? | Type of HIT<br>(acute HIT A, | Outcomes: Mortality,<br>Thromboembolism,<br>Limb Amputation,<br>Major Bleeding,<br>recurrence of HIT          |
|-----------------|-----------------------------|-----------------------------------------------------|--------------------------|---------------------------------------------|---------------------------------------------------|-----------------------------------------------------------------------|---------------------------------------------------------------------------------|------------------------------------------------------------------------------------------------------------------------------------|------------------------------|---------------------------------------------------------------------------------------------------------------|
| Goel 2015       | Hospital<br>data<br>review  | Hospitalized<br>patients                            | Platelet<br>transfusions | plasma<br>exchange or<br>plasma<br>infusion | 6332                                              | Hospital HIT<br>record                                                | NR                                                                              | NR                                                                                                                                 | HIT patients                 | Arterial/venous<br>thrombosis, acute<br>myocardial infarction<br>(AMI), stroke, and in-<br>hospital mortality |
| Refaai 2010     | retrospe<br>ctive<br>review | Hospitalized<br>surgery<br>patients                 | Platelet<br>transfusion  | Platelet<br>transfusions                    | 37                                                | 4T, Positive<br>anti-platelet<br>factor 4<br>(PF4)                    | Polyvinyl<br>sulfate<br>enzyme-<br>linked<br>immunosor<br>bent assay<br>(ELISA) | OD median<br>(range) 0.746<br>(0.43–3.15)                                                                                          | HIT patients                 | Thrombotic events,<br>Bleeding, Mortality                                                                     |
| Hopkins<br>2008 | Case<br>reports             | Clinically<br>indicated in<br>patients<br>with HIT. | Platelet<br>transfusions | Platelet<br>transfusions                    | 4                                                 | clinical<br>criteria<br>and<br>laboratory<br>tests                    | The<br>serotonin<br>release<br>assay (SRA).                                     | NR                                                                                                                                 | Not clear                    | A thrombotic<br>complication,<br>posttransfusion PLT<br>increments, Bleeding                                  |
| Senzel 2016     | Case<br>report              | Emergency<br>patient with<br>acute                  | Massive<br>transfusion   | Cardiac<br>bypass<br>surgery                | 1                                                 | Platelet count                                                        | ELISA                                                                           | NR                                                                                                                                 | Acute HIT                    | SRA performed on<br>the initial EIA<br>specimen was                                                           |

|  |  |                       |               |  |  |  |  |  |  |                                                                                   |
|--|--|-----------------------|---------------|--|--|--|--|--|--|-----------------------------------------------------------------------------------|
|  |  | myocardial infarction | (Plt and RBC) |  |  |  |  |  |  | strongly positive. A second EIA, drawn after a massive transfusion, was negative. |
|--|--|-----------------------|---------------|--|--|--|--|--|--|-----------------------------------------------------------------------------------|

### 3.7.a & 3.7.b. Ultrasonography and ultrasonography for persons with central venous catheter

1. Elalamy I, Tardy-Poncet B, Mulot A, et al. Risk factors for unfavorable clinical outcome in patients with documented heparin-induced thrombocytopenia. *Thrombosis research*. 2009;124(5):554-559.
2. Greinacher A, Farner B, Kroll H, Kohlmann T, Warkentin TE, Eichler P. Clinical features of heparin-induced thrombocytopenia including risk factors for thrombosis. *Thromb Haemost*. 2005;94(1):132-135.
3. Hong AP, Cook DJ, Sigouin CS, Warkentin TE. Central venous catheters and upper-extremity deep-vein thrombosis complicating immune heparin-induced thrombocytopenia. *Blood*. 2003;101(8):3049-3051.
4. Tardy B, Tardy-Poncet B, Fournel P, Venet C, Jospe R, Dacosta A. Lower limb veins should be systematically explored in patients with isolated heparin-induced thrombocytopenia. *Thrombosis and haemostasis*. 1999;82(3):1199-1200.
5. Warkentin TE, Kelton JG. A 14-year study of heparin-induced thrombocytopenia. *The American journal of medicine*. 1996;101(5):502-507.

#### Characteristics of included studies

| Author/Year     | Study Design           | Study population                                      | Treatment    | Procedure                                                                      | Number of eligible patients in the study | Patients have received a diagnosis of HIT based on---- ? | Laboratory test for diagnosis - | For ELISA test only, was Optical Density cut-off or individual OD reported? Y/N; if Y, What was the OD reported? | Type of HIT (acute HIT etc) | Outcomes: Mortality, Thromboembolism, Limb Amputation, Major Bleeding, recurrence of HIT |
|-----------------|------------------------|-------------------------------------------------------|--------------|--------------------------------------------------------------------------------|------------------------------------------|----------------------------------------------------------|---------------------------------|------------------------------------------------------------------------------------------------------------------|-----------------------------|------------------------------------------------------------------------------------------|
| Elalamy 2009    | Cohort                 | Inpatients hospitalized with HIT                      | No specified | NA                                                                             | 117                                      | NR                                                       | PAT positive                    | NR                                                                                                               | Not specified               | Death, length of stay in hospital, DVT                                                   |
| Greinacher 2005 | Retrospective analysis | HIT patients and post-cardiovascular surgery patients | NR           | Trauma/orthopedic surgery                                                      | 408                                      | Platelet counts                                          | HIPA                            | NR                                                                                                               | Acute HIT                   | Thromboembolic complications (TECs)                                                      |
| Hong 2003       | Observational study    | HIT patients with central                             | CVC use      | 145 had a CVC placed during the 2-week period prior to the episode of HIT. The | 260                                      | Platelet count                                           | 14C-serotonin release assay     | NR                                                                                                               | serologically confirmed HIT | upper- and lower-extremity DVTs                                                          |

|                |                                         |                         |                      |                                                                                                                  |     |                |                                                                           |    |                                                                       |                                                                              |
|----------------|-----------------------------------------|-------------------------|----------------------|------------------------------------------------------------------------------------------------------------------|-----|----------------|---------------------------------------------------------------------------|----|-----------------------------------------------------------------------|------------------------------------------------------------------------------|
|                |                                         | venous catheter (CVC)   |                      | remaining 115 patients with HIT did not receive a CVC.                                                           |     |                |                                                                           |    |                                                                       |                                                                              |
| Tardy 1999     | Retrospective review                    | Critically ill Patients | Danaparoid sodium    | Different types of surgery such as Urologic surgery, Gynecologic surgery, Visceral surgery, Cardiac surgery etc. | 42  | Platelet count | Platelet aggregation test or by heparin-induced platelet antibodies assay | NR | Acute HIT or past HIT                                                 | Thrombotic complications nor thrombosis extension, Major bleeding, Mortality |
| Warkentin 1996 | Case series, retrospective, multicenter | General HIT             | Heparin discontinued | NR                                                                                                               | 127 | Platelet count | Immune assay test                                                         | NR | With Thrombosis 65; with Isolated with Thrombosis Thrombocytopenia 62 | Death all cause, Death due to thrombosis, New Thrombosis                     |

### 3.8 Continue anticoagulation until platelet recovery or for 4-6 weeks or for 3 months in patients with isolated HIT

1. Warkentin TE, Kelton JG. A 14-year study of heparin-induced thrombocytopenia. *The American journal of medicine*. 1996;101(5):502-507.

#### Characteristics of included studies

| Author/<br>Year   | Study<br>Design                                  | Study<br>population | Treatment<br>N (%)      | Procedure | Number of<br>eligible<br>patients in<br>the study | Patients have<br>received a<br>diagnosis of<br>HIT based on-<br>--- ? | Laboratory<br>test for<br>diagnosis - | For ELISA test only,<br>was Optical Density<br>cut-off or individual<br>OD reported? Y/N;<br>if Y, What was the<br>OD reported? | Type of HIT<br>(acute HIT A,                                                            | Outcomes: Mortality,<br>Thromboembolism,<br>Limb Amputation,<br>Major Bleeding,<br>recurrence of HIT<br>N (%) |
|-------------------|--------------------------------------------------|---------------------|-------------------------|-----------|---------------------------------------------------|-----------------------------------------------------------------------|---------------------------------------|---------------------------------------------------------------------------------------------------------------------------------|-----------------------------------------------------------------------------------------|---------------------------------------------------------------------------------------------------------------|
| Warkentin<br>1996 | Case<br>series,<br>retrospective,<br>multicenter | General HIT         | Heparin<br>discontinued | NR        | 127                                               | Platelet<br>count                                                     | Immune<br>assay test                  | NR                                                                                                                              | with<br>Thrombosis<br>65; with<br>isolated<br>with<br>Thrombosis<br>Thrombocytopenia 62 | Death all cause,<br>Death due to<br>thrombosis, New<br>Thrombosis                                             |

### 3.9 VKA vs DOAC

1. Warkentin TE, Pai M, Linkins LA. Direct oral anticoagulants for treatment of HIT: update of Hamilton experience and literature review. *Blood*. 2017;130(9):1104-1113.

#### Characteristics of included studies

| Author/<br>Year   | Study<br>Design          | Study<br>population | Treatment<br>N (%)                                                  | Procedure | Number of<br>eligible<br>patients in<br>the study | Patients have<br>received a<br>diagnosis of<br>HIT based on<br>--- ? | Laboratory<br>test for<br>diagnosis -                                  | For ELISA test<br>only, was Optical<br>Density cut-off or<br>individual OD<br>reported? Y/N; if<br>Y, What was the<br>OD reported? | Type of HIT<br>(acute HIT A, | Outcomes: Mortality,<br>Thromboembolism,<br>Limb Amputation,<br>Major Bleeding,<br>recurrence of HIT<br>N (%) |
|-------------------|--------------------------|---------------------|---------------------------------------------------------------------|-----------|---------------------------------------------------|----------------------------------------------------------------------|------------------------------------------------------------------------|------------------------------------------------------------------------------------------------------------------------------------|------------------------------|---------------------------------------------------------------------------------------------------------------|
| Warkentin<br>2017 | prospe<br>ctive<br>study | General HIT         | DOACs<br>(rivaroxaba<br>n,<br>apixaban,<br>dabigatran,<br>edoxaban) | NR        | 46                                                | 4Ts score >=4<br>points;<br>positive<br>platelet factor<br>4 [PF4]   | heparin<br>immunoass<br>ay, positive<br>serotonin-<br>release<br>assay | NR                                                                                                                                 | confirmed<br>HIT; acute HIT  | New progressive, or<br>recurrent thrombosis,<br>major hemorrhage,                                             |

#### **4.1 Anticoagulation with a non-heparin anticoagulant or preoperative plasma exchange with heparin or heparin with an antiplatelet agent for patients with acute HIT or subacute HIT who require urgent cardiovascular surgery**

1. Aouifi A, Blanc P, Piriou V, Bastien OH, Ffrench P, Hanss M, et al. Cardiac surgery with cardiopulmonary bypass in patients with type II heparin-induced thrombocytopenia. *The Annals of thoracic surgery*. 2001;71(2):678-83.
2. Czosnowski QA, Finks SW, Rogers KC. Bivalirudin for patients with heparin-induced thrombocytopenia undergoing cardiovascular surgery. *Annals of Pharmacotherapy*. 2008;42(9):1304-9.
3. Dyke CM, Aldea G, Koster A, Smedira N, Avery E, Aronson S, et al. Off-Pump Coronary Artery Bypass With Bivalirudin for Patients With Heparin-Induced Thrombocytopenia or Antiplatelet Factor Four/Heparin Antibodies. *Annals of Thoracic Surgery*. 2007;84(3):836-9.
4. Furukawa K, Ohteki H, Hirahara K, Narita Y, Koga S. The use of argatroban as an anticoagulant for cardiopulmonary bypass in cardiac operations. *The Journal of thoracic and cardiovascular surgery*. 2001;122(6):1255-6.
5. Huang R, Welsh K, Jacobi E, Tint H, Bai Y, Nguyen A, et al., editors. Efficacy of Therapeutic Plasma Exchange in Heparin-induced Thrombocytopenia Patients Prior to Cardiac Surgery with Heparin. *TRANSFUSION*; 2014: WILEY-BLACKWELL 111 RIVER ST, HOBOKEN 07030-5774, NJ USA.
6. Jaben EA, Torloni AS, Pruthi RK, Winters JL. Use of plasma exchange in patients with heparin-induced thrombocytopenia: A report of two cases and a review of the literature. *Journal of clinical apheresis*. 2011;26(4):219-24.
7. Koster A, Dyke CM, Aldea G, Smedira NG, McCarthy IHL, Aronson S, et al. Bivalirudin During Cardiopulmonary Bypass in Patients With Previous or Acute Heparin-Induced Thrombocytopenia and Heparin Antibodies: Results of the CHOOSE-ON Trial. *Annals of Thoracic Surgery*. 2007;83(2):572-7.
8. Koster A, Hansen R, Kuppe H, Hetzer R, Crystal GJ, Mertzlufft F. Recombinant hirudin as an alternative for anticoagulation during cardiopulmonary bypass in patients with heparin-induced thrombocytopenia type II: A 1-year experience in 57 patients. *Journal of Cardiothoracic and Vascular Anesthesia*. 2000;14(3):243-8.
9. Koster A, Kukucka M Fau - Bach F, Bach F Fau - Meyer O, Meyer O Fau - Fischer T, Fischer T Fau - Mertzlufft F, Mertzlufft F Fau - Loebe M, et al. Anticoagulation during cardiopulmonary bypass in patients with heparin-induced thrombocytopenia type II and renal impairment using heparin and the platelet glycoprotein IIb/IIIa antagonist tirofiban. *Anesthesiology*. 2001;94(2):245-51.
10. Koster A, Loebe M Fau - Mertzlufft F, Mertzlufft F Fau - Kuppe H, Kuppe H Fau - Hetzer R, Hetzer R. Cardiopulmonary bypass in a patient with heparin-induced thrombocytopenia II and impaired renal function using heparin and the platelet GP IIb/IIIa inhibitor tirofiban as anticoagulant. 2000(0003-4975 (Print)).
11. Koster A, Meyer O Fau - Fischer T, Fischer T Fau - Kukucka M, Kukucka M Fau - Krabatsch T, Krabatsch T Fau - Bauer M, Bauer M Fau - Kuppe H, et al. One-year experience with the platelet glycoprotein IIb/IIIa antagonist tirofiban and heparin during cardiopulmonary bypass in patients with heparin-induced thrombocytopenia type II. *Journal Thoracic Cardiovascular Surgery*. 2001;122(6):1254-5.
12. Makhoul RG, McCann RL, Austin EH. Management of patients with heparin-associated thrombocytopenia and thrombosis requiring cardiac surgery. *Annals of Thoracic Surgery*. 1987;43(6):617-21.



13. Palatianos G, Michalis A, Alivizatos P, Lacoumenda S, Geroulanos S, Karabinis A, et al. Perioperative use of iloprost in cardiac surgery patients diagnosed with heparin-induced thrombocytopenia-reactive antibodies or with true HIT (HIT-reactive antibodies plus thrombocytopenia): An 11-year experience. American Journal of Hematology. 2015;90(7):608-17.
14. Palatianos GM, Foroulis CN, Vassili MI, Matsouka P, Astras GM, Kantidakis GH, et al. Preoperative detection and management of immune heparin-induced thrombocytopenia in patients undergoing heart surgery with iloprost. Journal of Thoracic and Cardiovascular Surgery. 2004;127(2):548-54.
15. Wadia Y, Cooper Jr JR, Bracey AW, Pinto K, Frazier O. Intraoperative anticoagulation management during cardiac transplantation for a patient with heparin-induced thrombocytopenia and a left ventricular assist device. Texas Heart Institute Journal. 2008;35(1):62.
16. Welsby IJ, Um J, Milano CA, Ortel TL, Arepally G. Plasmapheresis and heparin reexposure as a management strategy for cardiac surgical patients with heparin-induced thrombocytopenia. Anesthesia & Analgesia. 2010;110(1):30-5.

### Characteristics of included studies

| Author/ Year    | Study Design                          | Study population                                                                                   | Treatment                                                                                     | Procedure                                   | Number of eligible patients in the study | Patients have received a diagnosis of HIT based on --- ? | Laboratory test for diagnosis - | For ELISA test only, was Optical Density cut-off or individual OD reported? Y/N; if Y, what was the OD reported? | Type of HIT (acute HIT A etc)       | Outcomes: Mortality, Thromboembolism, Limb Amputation, Major Bleeding, recurrence of HIT              |
|-----------------|---------------------------------------|----------------------------------------------------------------------------------------------------|-----------------------------------------------------------------------------------------------|---------------------------------------------|------------------------------------------|----------------------------------------------------------|---------------------------------|------------------------------------------------------------------------------------------------------------------|-------------------------------------|-------------------------------------------------------------------------------------------------------|
| Aouifi 2001     | Cross-sectional study                 | patients who underwent cardiac surgery and patients presented with preoperative type II HIT        | danaparoid sodium n=4, heparin sodium n=6; transfusion of blood products, Fresh frozen plasma | Cardiac Surgery with Cardiopulmonary Bypass | 10                                       | Platelet count                                           | NA                              | NA                                                                                                               | Type II HIT                         | Intraoperative thrombotic complication,                                                               |
| Czosnowski 2008 | Prospective and retrospective studies | HIT undergoing any cardiovascular surgical procedure other than percutaneous coronary intervention | Bivalirudin                                                                                   | Coronary Artery Bypass                      | 93                                       | Platelet count, Anti-PF4/H antibodies                    | Not clear                       | NR                                                                                                               | on-pump CPB n=46; off-pump CPB n=47 | Valve repair and replacement, right ventricular assist device implantation, and heart transplantation |
| Durand 2008     | Case Report                           | Patient with MI need CABG and                                                                      | Danaproid-Tirofiban + UFH, rFVIIa                                                             | CABG + Mitral valve                         | 1                                        | Platelet count                                           | ELIZA, Plt aggregation test     | NR                                                                                                               | HIT I                               | No thrombosis, Major hemorrhage                                                                       |

| Author/ Year   | Study Design                               | Study population                                                                                                                                                                                                                   | Treatment                                   | Procedure                            | Number of eligible patients in the study | Patients have received a diagnosis of HIT based on--- ?      | Laboratory test for diagnosis -    | For ELISA test only, was Optical Density cut-off or individual OD reported? Y/N; if Y, what was the OD reported? | Type of HIT (acute HIT A etc) | Outcomes: Mortality, Thromboembolism, Limb Amputation, Major Bleeding, recurrence of HIT |
|----------------|--------------------------------------------|------------------------------------------------------------------------------------------------------------------------------------------------------------------------------------------------------------------------------------|---------------------------------------------|--------------------------------------|------------------------------------------|--------------------------------------------------------------|------------------------------------|------------------------------------------------------------------------------------------------------------------|-------------------------------|------------------------------------------------------------------------------------------|
|                |                                            | mitral valve replacement                                                                                                                                                                                                           |                                             | replacement+ CPB                     |                                          |                                                              |                                    |                                                                                                                  |                               |                                                                                          |
| Dyke 2007      | Prospective, open-label, multicenter study | least 18 years of age and scheduled for off-pump coronary artery bypass                                                                                                                                                            | Bivalirudin                                 | Coronary Artery Bypass               | 51                                       | Platelet count, Anti-PF4/H antibodies                        | Serologic and clinical evidence    | NR                                                                                                               | HIT/TS                        | thrombocytopenia or thrombosis, death, Bleeding, transfusion                             |
| Fernandes 2019 | Case Report                                | Patient with LV failure candidate for heart transplantation undergo left ventricle assist device (LVAD)                                                                                                                            | Argatroban discharged with ASA and warfarin | left ventricle assist device (LVAD)  | 1                                        | Reduced Platelet count,                                      | ELISA, SRA                         | (OD) was >2, which indicated a very strong HIT correlation                                                       | HIT II                        | Discharged waiting for Cardiac transplant                                                |
| Huang 2014     | Case reports                               | patient requires cardiac pulmonary bypass surgery (CPB)                                                                                                                                                                            | Therapeutic plasma exchange (TPE)           | Cardiac Surgery                      | 3                                        | NR                                                           | serotonin release assay positivity | O.D. value >0.547                                                                                                | HIT                           | Duskinness, Reduce HIT ELISA Titer (HET)                                                 |
| Jaben 2011     | Case Reports                               | Case 1 is a 46-year-old male with cardiac amyloidosis who needed urgent placement of a left ventricular assist device. Case 2 is a 34-year-old woman with acute myocarditis who needed placement of a biventricular assist device. | Plasma Exchange                             | Cardiopulmonary bypass surgery (CPB) | 2                                        | platelet count, Heparin/PF4 antibodies and clinical evidence | Enzyme-linked immunosorbent assay  | NR                                                                                                               | Acute HIT                     | Reduction in the thrombus, no complications                                              |

|              |                               |                                                                                                                                     |                                                                                                 |                                      |    |                                 |                                            |    |                                           |                                                                                                                                  |
|--------------|-------------------------------|-------------------------------------------------------------------------------------------------------------------------------------|-------------------------------------------------------------------------------------------------|--------------------------------------|----|---------------------------------|--------------------------------------------|----|-------------------------------------------|----------------------------------------------------------------------------------------------------------------------------------|
| Koster 2000  | Retrospective cohort          | Patients with cardiac surgery require cardiopulmonary bypass                                                                        | Recombinant hirudin                                                                             | cardiac surgery                      | 57 | Platelet count                  | heparin-induced platelet aggregation assay | NR | HIT II                                    | Thromboses or embolisms                                                                                                          |
| Koster 2000  | Case Report                   | Patients with cardiac surgery require cardiopulmonary bypass and impaired renal function                                            | Recombinant hirudin, Tirofiban                                                                  | Cardiopulmonary bypass surgery (CPB) | 1  | Platelet count                  | HIPA                                       | NR | HIT II                                    | No Thromboses or embolisms, No death                                                                                             |
| Koster 2000  | Case Report                   | Patient need redo mitral valve replacement                                                                                          | Recombinant hirudin, Tirofiban                                                                  | Cardiopulmonary bypass surgery (CPB) | 1  | Platelet count                  | HIPA                                       | NR | HIT II                                    | No clot in CPB system, No thrombosis, No emboli,                                                                                 |
| Koster 2001  | Case series                   | Renal impairment, and CPB                                                                                                           | Heparin and tirofiban                                                                           | Cardiopulmonary bypass surgery (CPB) | 10 | Platelet count                  | HIPA                                       | NR | HITII                                     | No intra- post-operative thrombosis and emboli, no death                                                                         |
| Koster 2001  | One-arm prospective Cohort    | Patients need cardiac surgery and CPB                                                                                               | UFH + Tirofiban                                                                                 | Cardiopulmonary Bypass               | 47 | NR                              | HIPA                                       | NR | HIT II                                    | No Thrombosis, No Emboli, Minor Hemorrhage, Death,                                                                               |
| Koster 2007  | Open-label, multicenter trial | First time or redo-CABG, single valve surgery, or CABG plus single-valve surgery, and had a diagnosis of confirmed or suspected HIT | Bivalirudin                                                                                     | Cardiopulmonary Bypass               | 50 | serologic and clinical evidence | serologic and clinical evidence            | NR | HITT n=43, Remote HIT=6                   | Absence of death, Q-wave myocardial infarction (MI), repeat operation for coronary revascularization, and stroke, major bleeding |
| Makhoul 1987 | Case reports                  | Patients with HATT require reexposure to heparin for emergency cardiac operations requiring cardiopulmonary bypass while still      | Platelet aggregation to heparin in vitro; therefore, aspirin and dipyridamole were administered | Cardiopulmonary bypass               | 2  | Platelet count                  | Platelet aggregation to heparin in vitro   | NR | Heparin - associated thrombocytopenia and | recurrent chest pain, discharged home                                                                                            |

|                 |                                |                                                                                      |                                                                          |                         |    |                                                                   |                   |           |                       |                                                                                       |
|-----------------|--------------------------------|--------------------------------------------------------------------------------------|--------------------------------------------------------------------------|-------------------------|----|-------------------------------------------------------------------|-------------------|-----------|-----------------------|---------------------------------------------------------------------------------------|
|                 |                                | demonstrating positive in vitro platelet aggregation with heparin.                   |                                                                          |                         |    |                                                                   |                   |           | thrombosis (HATT)     |                                                                                       |
| Palatianos 2004 | Longitudinal data              | Patients with immune heparin-induced thrombocytopenia undergoing cardiac surgery     | Iloprost                                                                 | cardiac surgery         | 10 | Platelet count                                                    | EIA and HIPA      | NR        | HITT                  | Mortality, Major Bleeding,                                                            |
| Palatianos 2015 | Longitudinal data for 11 years | cardiac surgery patients with HIT                                                    | Iloprost (n=110)<br>Controls (n=118)                                     | cardiac surgery         | 46 | Platelet count                                                    | EIA and HIPAG     | OD <0.300 | Acute HIT             | Adverse events, 30-Day mortality, Thromboembolism, Bleeding                           |
| Wadia 2008      | Case report                    | A Patient with Heparin-Induced Thrombocytopenia and a Left Ventricular Assist Device | Plasmapheresis (3 L of the patient's plasma replaced with donor plasma). | Cardiac Transplantation | 1  | Platelet count                                                    | Immune assay test | NR        | Acute HIT             | No evidence of thrombosis in the bypass circuit or elsewhere, no complications, Alive |
| Welsby 2010     | A retrospective chart review   | Cardiac Surgical Patients with Heparin-Induced Thrombocytopenia                      | Plasmapheresis and Heparin Re-exposure                                   | Cardiac Surgery         | 11 | Positive antiheparin/platelet factor 4 (anti-HPF4) antibody titer | NR                | NR        | acute or subacute HIT | Developed an ischemic foot, in the setting of cardiogenic shock, reduced titers       |

#### 4.2 Anticoagulation with a non-heparin anticoagulant or preoperative plasma exchange with heparin or heparin with an antiplatelet agent for patients with subacute HIT B or remote HIT who require urgent cardiovascular surgery

1. Olinger G, Hussey C, Olive J, Malik M. Cardiopulmonary bypass for patients with previously documented heparin-induced platelet aggregation. *The Journal of thoracic and cardiovascular surgery*. 1984;87(5):673-677.
2. Pötzsch B, Klövekorn W-P, Madlener K. Use of heparin during cardiopulmonary bypass in patients with a history of heparin-induced thrombocytopenia. *New England Journal of Medicine*. 2000;343(7):515-515.
3. Selleng S, Haneya A, Hirt S, Selleng K, Schmid C, Greinacher A. Management of anticoagulation in patients with subacute heparin-induced thrombocytopenia scheduled for heart transplantation. *Blood*. 2008;112(10):4024-4027.
4. Selleng S, Lubenow N, Wollert H-G, Müllejjans B, Greinacher A. Emergency cardiopulmonary bypass in a bilaterally nephrectomized patient with a history of heparin-induced thrombocytopenia: successful reexposure to heparin. *The Annals of thoracic surgery*. 2001;71(3):1041-1042.
5. Warkentin TE, Kelton JG. Temporal aspects of heparin-induced thrombocytopenia. *New England Journal of Medicine*. 2001;344(17):1286-1292.
6. Warkentin TE, Sheppard J-AI. Serological investigation of patients with a previous history of heparin-induced thrombocytopenia who are reexposed to heparin. *Blood*. 2014;123(16):2485-2493.
7. Davis Z, Anderson R, Short D, Garber D, Valgiusti A. Favorable outcome with bivalirudin anticoagulation during cardiopulmonary bypass. *The Annals of thoracic surgery*. 2003;75(1):264-265.
8. Grocott HP, Root J, Berkowitz SD, Landolfo K. Coagulation complicating cardiopulmonary bypass in a patient with heparin-induced thrombocytopenia receiving the heparinoid, danaparoid sodium. *Journal of cardiothoracic and vascular anesthesia*. 1997;11(7):875-877.
9. Kappa JR, Cottrell ED, Berkowitz HD, et al. Carotid endarterectomy in patients with heparin-induced platelet activation: comparative efficacy of aspirin and iloprost (ZK36374). *Journal of vascular surgery*. 1987;5(5):693-701.
10. Nuttall GA, Oliver Jr WC, Santrach PJ, et al. Patients with a history of type II heparin-induced thrombocytopenia with thrombosis requiring cardiac surgery with cardiopulmonary bypass: a prospective observational case series. *Anesthesia & Analgesia*. 2003;96(2):344-350.
11. Warkentin TE, Sheppard J-AI, Chu FV, Kapoor A, Crowther MA, Gangji A. Plasma exchange to remove HIT antibodies: dissociation between enzyme-immunoassay and platelet activation test reactivities. *Blood*. 2015;125(1):195-198.

#### Characteristics of included studies

| Author/<br>Year | Study<br>Design       | Study population                                                                                                                                                                                         | Treatment                                         | Procedure                     | Number<br>of<br>eligible<br>patients<br>in the<br>study | Patients<br>have<br>received a<br>diagnosis<br>of HIT<br>based on-<br>--- ? | Laboratory<br>test for<br>diagnosis -                                          | For ELISA<br>test only,<br>was Optical<br>Density<br>cut-off or<br>individual<br>OD<br>reported?<br>Y/N; if Y,<br>What was<br>the OD<br>reported? | Type of HIT<br>(acute HIT A<br>etc)                     | Outcomes: Mortality,<br>Thromboembolism,<br>Limb Amputation,<br>Major Bleeding,<br>recurrence of HIT |
|-----------------|-----------------------|----------------------------------------------------------------------------------------------------------------------------------------------------------------------------------------------------------|---------------------------------------------------|-------------------------------|---------------------------------------------------------|-----------------------------------------------------------------------------|--------------------------------------------------------------------------------|---------------------------------------------------------------------------------------------------------------------------------------------------|---------------------------------------------------------|------------------------------------------------------------------------------------------------------|
| Davis 2003      | Case<br>report        | case with previous<br>syncopal episodes,<br>progressive shortness<br>of breath, pulmonary<br>edema, severe<br>calcific aortic stenosis,<br>and a history of HIT<br>required aortic valve<br>replacement. | Bivalirudin                                       | Cardiopulm<br>onary<br>Bypass | 1                                                       | Anti- PF4                                                                   | A repeat<br>enzyme-<br>linked<br>immunosor<br>bent assay<br>(ELISA) was<br>-ve |                                                                                                                                                   | a previous<br>positive assay<br>for anti-PF4<br>patient | No blood clot,<br>discharged home                                                                    |
| Grocott<br>1997 | Case<br>report        | A 65-year-old man<br>presented for coronary<br>artery bypass graft<br>surgery (CABG) after<br>developing class IV<br>angina                                                                              | Heparinoid,<br>Danaparoid<br>Sodium               | Cardiopulm<br>onary<br>Bypass | 1                                                       | Anti- PF4                                                                   | A repeat<br>enzyme-<br>linked<br>immunosor<br>bent assay<br>(ELISA) was<br>-ve | NR                                                                                                                                                | past clinical<br>history of HIT                         | Surgery and CPB<br>proceeded without<br>incident, Blood clot,<br>Discharged home                     |
| Kappa 1987      | Case<br>reports       | Patients with<br>confirmed heparin-<br>induced platelet<br>activation                                                                                                                                    | Aspirin,<br>Iloprost                              | carotid<br>endarterect<br>omy | 2                                                       | Platelet<br>count, PF4                                                      | Not clear                                                                      | Not clear                                                                                                                                         | Not clear                                               | No thrombotic<br>complications                                                                       |
| Nuttall<br>2003 | Prospectiv<br>e study | Cardiac surgical<br>patients undergoing<br>CPB                                                                                                                                                           | Porcine<br>heparin, r-<br>hirudin or<br>Lepirudin | CPB                           | 12                                                      | Platelet<br>count, PF4                                                      | Enzyme-<br>linked<br>immunosor<br>bent<br>assay<br>(ELISA)                     | NR                                                                                                                                                | Previous<br>clinical<br>diagnosis of<br>HITT type II    | Patients survived the<br>surgery, and<br>thrombotic or<br>embolic<br>complications                   |
| Olinger<br>1984 | Case<br>reports       | Patients with prior<br>heparin-dependent<br>intravascular<br>coagulation who                                                                                                                             | Cardiac<br>catheterizat<br>ion                    | Cardiopulm<br>onary<br>bypass | 3                                                       | Platelet<br>count                                                           | Not clear                                                                      | NR                                                                                                                                                | Patients with<br>previously<br>documented<br>heparin-   | Mortality,<br>Intravascular<br>thrombosis or<br>bleeding diathesis,                                  |

| Author/<br>Year   | Study<br>Design                   | Study population                                                                                                                                                   | Treatment                               | Procedure                                                                    | Number<br>of<br>eligible<br>patients<br>in the<br>study | Patients<br>have<br>received a<br>diagnosis<br>of HIT<br>based on-<br>--- ? | Laboratory<br>test for<br>diagnosis -                                                           | For ELISA<br>test only,<br>was Optical<br>Density<br>cut-off or<br>individual<br>OD<br>reported?<br>Y/N; if Y,<br>What was<br>the OD<br>reported? | Type of HIT<br>(acute HIT A<br>etc)                        | Outcomes: Mortality,<br>Thromboembolism,<br>Limb Amputation,<br>Major Bleeding,<br>recurrence of HIT |
|-------------------|-----------------------------------|--------------------------------------------------------------------------------------------------------------------------------------------------------------------|-----------------------------------------|------------------------------------------------------------------------------|---------------------------------------------------------|-----------------------------------------------------------------------------|-------------------------------------------------------------------------------------------------|---------------------------------------------------------------------------------------------------------------------------------------------------|------------------------------------------------------------|------------------------------------------------------------------------------------------------------|
|                   |                                   | require<br>cardiopulmonary<br>bypass                                                                                                                               |                                         |                                                                              |                                                         |                                                                             |                                                                                                 |                                                                                                                                                   | induced<br>platelet<br>aggregation                         |                                                                                                      |
| Pötzsch<br>2000   |                                   | Cardiopulmonary<br>Bypass<br>in Patients with a<br>History of Heparin-<br>Induced<br>Thrombocytopenia                                                              | Heparin(<br>unfractionat<br>ed heparin) | Cardiopulm<br>onary<br>Bypass                                                | 10                                                      | Had heparin-<br>induced<br>platelet-<br>aggregatio<br>n assay<br>positive   | At the time<br>of surgery,<br>all patients<br>were<br>negative to<br>an antigenic<br>assay      | NR                                                                                                                                                | Patients with<br>a History<br>acute HIT                    | No prolonged<br>thrombocytopenia,<br>Excellent recovery                                              |
| Selleng<br>2001   | Case<br>report                    | Patient with a history<br>of bilateral<br>nephrectomy and HIT<br>who needed<br>emergency<br>coronary artery bypass<br>grafting.                                    | heparin                                 | Coronary<br>artery<br>bypass<br>Surgery;<br>Renal<br>replacemen<br>t therapy | 1                                                       | Clinically<br>suspected                                                     | serologically<br>proved by<br>the heparin-<br>induced<br>platelet<br>activation<br>assay (HIPA) | NR                                                                                                                                                | Patient with a<br>history                                  | No HIT-related<br>complications,<br>Platelet counts<br>continuously<br>Increased, Major<br>bleeding  |
| Selleng<br>2008   | Case<br>report                    | Patients scheduled for<br>heart transplantation<br>with end-stage<br>heart failure<br>complicated by<br>subacute heparin-<br>induced<br>thrombocytopenia<br>(HIT). | unfractionat<br>ed heparin<br>(UFH)     | Heart<br>transplantat<br>ion                                                 | 3                                                       | Platelet<br>count,<br>anti-<br>PF4/hepar<br>in IgG<br>antibodies            | EIA, but<br>HIPA<br>negative                                                                    | OD 0.627<br>OD; cut-off<br>0.500                                                                                                                  | Acute HIT,<br>previous HIT                                 | Major bleeding,<br>Thromboembolic<br>complications,<br>Thrombotic events                             |
| Warkentin<br>2001 | Reviewed<br>the<br>medical<br>and | Patients with<br>serologically confirmed<br>heparin induced<br>thrombocytopenia                                                                                    | heparin                                 | Not clear                                                                    | 243                                                     | Platelet<br>count                                                           | platelet<br>serotonin-<br>release<br>assay                                                      | NR                                                                                                                                                | Typical onset<br>HIT (n=170);<br>Rapid onset<br>HIT (n=73) | New thrombosis, Fatal<br>hemorrhage, Mortality<br>within 30days after<br>onset of HIT                |

| Author/<br>Year   | Study<br>Design       | Study population                                                                                                                                                                                                                                      | Treatment                                                                     | Procedure                                                                             | Number<br>of<br>eligible<br>patients<br>in the<br>study | Patients<br>have<br>received a<br>diagnosis<br>of HIT<br>based on-<br>--- ? | Laboratory<br>test for<br>diagnosis -  | For ELISA<br>test only,<br>was Optical<br>Density<br>cut-off or<br>individual<br>OD<br>reported?<br>Y/N; if Y,<br>What was<br>the OD<br>reported? | Type of HIT<br>(acute HIT A<br>etc)                                  | Outcomes: Mortality,<br>Thromboembolism,<br>Limb Amputation,<br>Major Bleeding,<br>recurrence of HIT |
|-------------------|-----------------------|-------------------------------------------------------------------------------------------------------------------------------------------------------------------------------------------------------------------------------------------------------|-------------------------------------------------------------------------------|---------------------------------------------------------------------------------------|---------------------------------------------------------|-----------------------------------------------------------------------------|----------------------------------------|---------------------------------------------------------------------------------------------------------------------------------------------------|----------------------------------------------------------------------|------------------------------------------------------------------------------------------------------|
|                   | laboratory<br>records |                                                                                                                                                                                                                                                       |                                                                               |                                                                                       |                                                         |                                                                             |                                        |                                                                                                                                                   |                                                                      |                                                                                                      |
| Warkentin<br>2014 | Case<br>reports       | Cases presenting with thrombotic stroke/thrombocytopenia: one following shoulder hemiarthroplasty (performed without heparin) and the other presenting to the emergency room without prior hospitalization, heparin exposure, or preceding infection. | Aspirin, fondaparinux, argatroban warfarin; heparin, argatroban, fondaparinux | Internal carotid artery terminus,                                                     | 2                                                       | Platelet count                                                              | EIAs and in the SRA                    | < 0.40                                                                                                                                            | spontaneous HIT syndrome (for acute thrombosis and thrombocytopenia) | Recovered,                                                                                           |
| Warkentin<br>2015 | Case<br>report        | A 76-year-old female with renal carcinoma invading the inferior vena cava (IVC)/right atrium developed HIT without thrombosis                                                                                                                         | Repeated therapeutic plasma exchange (TPE)                                    | coronary artery bypass grafting (CABG) and removal of IVC/intracardiac tumor thrombus | 1                                                       | Serologically confirmed                                                     | SRA and EIA remained strongly positive | 2.58 optical density [OD] units                                                                                                                   | Acute or subacute HIT                                                | Discharged on postoperative day 34. Tumor removal was incomplete.                                    |



## 5.1 Anticoagulation with a non-heparin anticoagulant for patients with acute HIT or subacute HIT A who require urgent percutaneous cardiovascular interventions

1. Jang I-K, Lewis BE, Matthai WH, Kleiman NS. Argatroban anticoagulation in conjunction with glycoprotein IIb/IIIa inhibition in patients undergoing percutaneous coronary intervention: an open-label, nonrandomized pilot study. *Journal of thrombosis and thrombolysis*. 2004;18(1):31-37.
2. Lee MS, Liao H, Yang T, et al. Comparison of bivalirudin versus heparin plus glycoprotein IIb/IIIa inhibitors in patients undergoing an invasive strategy: a meta-analysis of randomized clinical trials. *Int J Cardiol*. 2011;152(3):369-374.
3. Lewis BE, Matthai Jr WH, Cohen M, Moses JW, Hursting MJ, Leya F. Argatroban anticoagulation during percutaneous coronary intervention in patients with heparin-induced thrombocytopenia. *Catheterization and Cardiovascular Interventions*. 2002;57(2):177-184.
4. Magnani HN, Gallus A. Heparin-induced thrombocytopenia (HIT). A report of 1,478 clinical outcomes of patients treated with danaparoid (Orgaran) from 1982 to mid-2004. *Thrombosis and Haemostasis*. 2006;95(6):967-981.
5. Mahaffey KW, Lewis BE, Wildermann NM, et al. The Anticoagulant Therapy with Bivalirudin to Assist in the Performance of Percutaneous Coronary Intervention in Patients with Heparin-Induced Thrombocytopenia (ATBAT) Study: Main Results. *Journal of Invasive Cardiology*. 2003;15(11):611-616.

### Characteristics of included studies

| Author/<br>Year | Study Design                         | Study population                                        | Treatment  | Procedure | Number of eligible patients in the study | Patients have received a diagnosis of HIT based on --- ? | Laboratory test for diagnosis - | For ELISA test only, was Optical Density cut-off or individual OD reported? Y/N; if Y, what was the OD reported? | Type of HIT (acute HIT A etc) | Outcomes: Mortality, Thromboembolism, Limb Amputation, Major Bleeding, recurrence of HIT |
|-----------------|--------------------------------------|---------------------------------------------------------|------------|-----------|------------------------------------------|----------------------------------------------------------|---------------------------------|------------------------------------------------------------------------------------------------------------------|-------------------------------|------------------------------------------------------------------------------------------|
| Jang 2004       | multicenter, prospective pilot study | patients undergoing percutaneous coronary intervention. | Argatroban | PCI       | 152                                      | NR                                                       | NR                              | NR                                                                                                               | NR                            | Mortality, Myocardial infarction, or urgent revascularization, Major bleeding            |

| Author/<br>Year | Study Design                  | Study population                                                                                                                                                                                    | Treatment                                                     | Procedure                                | Number of eligible patients in the study      | Patients have received a diagnosis of HIT based on--- ? | Laboratory test for diagnosis -                                                                           | For ELISA test only, was Optical Density cut-off or individual OD reported? Y/N; if Y, what was the OD reported? | Type of HIT (acute HIT A etc)                                                  | Outcomes: Mortality, Thromboembolism, Limb Amputation, Major Bleeding, recurrence of HIT                           |
|-----------------|-------------------------------|-----------------------------------------------------------------------------------------------------------------------------------------------------------------------------------------------------|---------------------------------------------------------------|------------------------------------------|-----------------------------------------------|---------------------------------------------------------|-----------------------------------------------------------------------------------------------------------|------------------------------------------------------------------------------------------------------------------|--------------------------------------------------------------------------------|--------------------------------------------------------------------------------------------------------------------|
| Lee 2011        | Systematic Review             | Patients undergoing PCI                                                                                                                                                                             | 9785 bivalirudin and 9987 heparin plus GP IIb/IIIa inhibitors | Percutaneous coronary intervention (PCI) | 19,772                                        | NR                                                      | NR                                                                                                        | NR                                                                                                               | NR                                                                             | Mortality, Urgent revascularization, Major bleeding                                                                |
| Lewis 2002      | Prospective study             | patients were males or nonpregnant females >18 years old                                                                                                                                            | Argatroban                                                    | Percutaneous coronary intervention (PCI) | Initial group (n =91)<br>Repeat group (n =21) | Platelet count                                          | Antibody test for HIT                                                                                     | NR                                                                                                               | Patient with history of HIT or a previous or current clinical diagnosis of HIT | Adequate, anticoagulation, Mortality, Myocardial infarction, or Revascularization, hospitalization, Major bleeding |
| Magnani 2006    | Cross sectional study         | General HIT, Renal failure patients                                                                                                                                                                 | danaparoid                                                    | Dialysis                                 | 1,291 /1,478                                  | Platelet count                                          | Immune assay test, platelet aggregation test (PAT, or HIPA                                                | NR                                                                                                               | isolated HIT, Past HIT, Current HIT                                            | Death all cause, New thromboses, Adverse events, Major bleeding, Amputation                                        |
| Mahaffey 2003   | Prospective, open-label study | Patients aged 18 years or older with a new diagnosis of or previous clinically suspected or objectively recorded HIT/HITS were eligible for inclusion if the decision to perform PCI had been made. | Bivalirudin                                                   | Percutaneous Coronary Intervention       | 52                                            | Platelet count                                          | heparin-induced platelet aggregation or other functional assay for HIT or immunoassay for HIT antibodies, | NR                                                                                                               | HIT 19 (37%) or HIT with thrombotic syndrome (HITS) 22 (43%) patients          | Mortality, Major bleeding, Major cardiac events                                                                    |

## **5.2 Anticoagulation with a non-heparin anticoagulant or unfractionated heparin for patients with subacute HIT B or remote HIT who require urgent percutaneous cardiovascular interventions**

1. Hale LP, Smith K, Braden GA, Owen J. Organ during rotational atherectomy in the setting of heparin-induced thrombocytopenia. *Catheterization & Cardiovascular Diagnosis*. 1998;45(3):318-322.
2. Lee MS, Liao H, Yang T, et al. Comparison of bivalirudin versus heparin plus glycoprotein IIb/IIIa inhibitors in patients undergoing an invasive strategy: a meta-analysis of randomized clinical trials. *Int J Cardiol*. 2011;152(3):369-374.
3. Jang I-K, Lewis BE, Matthai WH, Kleiman NS. Argatroban anticoagulation in conjunction with glycoprotein IIb/IIIa inhibition in patients undergoing percutaneous coronary intervention: an open-label, nonrandomized pilot study. *Journal of thrombosis and thrombolysis*. 2004;18(1):31-37.
4. Davis Z, Anderson R, Short D, Garber D, Valgiusti A. Favorable outcome with bivalirudin anticoagulation during cardiopulmonary bypass. *The Annals of thoracic surgery*. 2003;75(1):264-265.
5. Grocott HP, Root J, Berkowitz SD, Landolfo K. Coagulation complicating cardiopulmonary bypass in a patient with heparin-induced thrombocytopenia receiving the heparinoid, danaparoid sodium. *Journal of cardiothoracic and vascular anesthesia*. 1997;11(7):875-877.
6. Olinger G, Hussey C, Olive J, Malik M. Cardiopulmonary bypass for patients with previously documented heparin-induced platelet aggregation. *The Journal of thoracic and cardiovascular surgery*. 1984;87(5):673-677.
7. Selleng S, Lubenow N, Wollert H-G, Müllejans B, Greinacher A. Emergency cardiopulmonary bypass in a bilaterally nephrectomized patient with a history of heparin-induced thrombocytopenia: successful reexposure to heparin. *The Annals of thoracic surgery*. 2001;71(3):1041-1042.
8. Pötzsch B, Klövekorn W-P, Madlener K. Use of heparin during cardiopulmonary bypass in patients with a history of heparin-induced thrombocytopenia. *New England Journal of Medicine*. 2000;343(7):515-515.
9. Selleng S, Haneya A, Hirt S, Selleng K, Schmid C, Greinacher A. Management of anticoagulation in patients with subacute heparin-induced thrombocytopenia scheduled for heart transplantation. *Blood*. 2008;112(10):4024-4027.
10. Warkentin TE, Kelton JG. Temporal aspects of heparin-induced thrombocytopenia. *New England Journal of Medicine*. 2001;344(17):1286-1292.

11. Warkentin TE, Sheppard J-AI. Serological investigation of patients with a previous history of heparin-induced thrombocytopenia who are reexposed to heparin. *Blood*. 2014;123(16):2485-2493.

### Characteristics of included studies

| Author/<br>Year | Study<br>Design | Study<br>population                                                                                                                                                                                                        | Treatment                           | Procedure                     | Number<br>of eligible<br>patients<br>in the<br>study | Patients<br>have<br>received a<br>diagnosis of<br>HIT based<br>on---- ? | Laboratory<br>test for<br>diagnosis -                                          | For ELISA test<br>only, was<br>Optical<br>Density cut-<br>off or<br>individual OD<br>reported?<br>Y/N; if Y,<br>What was the<br>OD reported? | Type of HIT<br>(acute HIT A<br>etc)                     | Outcomes: Mortality,<br>Thromboembolism,<br>Limb Amputation,<br>Major Bleeding,<br>recurrence of HIT |
|-----------------|-----------------|----------------------------------------------------------------------------------------------------------------------------------------------------------------------------------------------------------------------------|-------------------------------------|-------------------------------|------------------------------------------------------|-------------------------------------------------------------------------|--------------------------------------------------------------------------------|----------------------------------------------------------------------------------------------------------------------------------------------|---------------------------------------------------------|------------------------------------------------------------------------------------------------------|
| Davis 2003      | Case<br>report  | case with<br>previous<br>syncopal<br>episodes,<br>progressive<br>shortness of<br>breath,<br>pulmonary<br>edema, severe<br>calcific aortic<br>stenosis, and a<br>history of HIT<br>required aortic<br>valve<br>replacement. | Bivalirudin                         | Cardiopulm<br>onary<br>Bypass | 1                                                    | Anti- PF4                                                               | A repeat<br>enzyme-<br>linked<br>immunosor<br>bent assay<br>(ELISA) was<br>-ve |                                                                                                                                              | a previous<br>positive assay<br>for anti-PF4<br>patient | No blood clot,<br>discharged home                                                                    |
| Grocott<br>1997 | Case<br>report  | A 65-year-old<br>man presented<br>for coronary<br>artery bypass<br>graft<br>surgery (CABG)<br>after developing<br>class IV angina                                                                                          | Heparinoid,<br>Danaparoid<br>Sodium | Cardiopulm<br>onary<br>Bypass | 1                                                    | Anti- PF4                                                               | A repeat<br>enzyme-<br>linked<br>immunosor<br>bent assay<br>(ELISA) was<br>-ve | NR                                                                                                                                           | past clinical<br>history of HIT                         | Surgery and CPB<br>proceeded without<br>incident, Blood clot,<br>Discharged home                     |
| Hale 1998       | Case<br>report  | A 54-year-old<br>physician with<br>the factor V                                                                                                                                                                            | bolus of<br>Orgaran,<br>abciximab   | catheter-<br>based            | 1                                                    | NA                                                                      | NA                                                                             | NA                                                                                                                                           | Not HIT                                                 | thrombotic or<br>hemorrhagic<br>complications                                                        |

| Author/<br>Year | Study<br>Design                               | Study<br>population                                                                                                      | Treatment                                                                    | Procedure                                          | Number<br>of eligible<br>patients<br>in the<br>study | Patients<br>have<br>received a<br>diagnosis of<br>HIT based<br>on---- ?     | Laboratory<br>test for<br>diagnosis -                                                      | For ELISA test<br>only, was<br>Optical<br>Density cut-<br>off or<br>individual OD<br>reported?<br>Y/N; if Y,<br>What was the<br>OD reported? | Type of HIT<br>(acute HIT A<br>etc)                                                         | Outcomes: Mortality,<br>Thromboembolism,<br>Limb Amputation,<br>Major Bleeding,<br>recurrence of HIT |
|-----------------|-----------------------------------------------|--------------------------------------------------------------------------------------------------------------------------|------------------------------------------------------------------------------|----------------------------------------------------|------------------------------------------------------|-----------------------------------------------------------------------------|--------------------------------------------------------------------------------------------|----------------------------------------------------------------------------------------------------------------------------------------------|---------------------------------------------------------------------------------------------|------------------------------------------------------------------------------------------------------|
|                 |                                               | Leiden<br>mutation and<br>heparin<br>exposure for<br>treatment of PE                                                     |                                                                              | therapy of<br>the RCA and<br>possibly the<br>Cx-OM |                                                      |                                                                             |                                                                                            |                                                                                                                                              |                                                                                             |                                                                                                      |
| Jang 2004       | multicenter,<br>prospective<br>pilot<br>study | patients<br>undergoing<br>percutaneous<br>coronary<br>intervention.                                                      | Argatroban                                                                   | PCI                                                | 152                                                  | NA                                                                          | NA                                                                                         | NA                                                                                                                                           | Not HIT                                                                                     | Mortality, Myocardial<br>infarction, or urgent<br>revascularization, Major<br>bleeding               |
| Lee 2011        | Systematic<br>Review                          | Patients<br>undergoing PCI                                                                                               | 9785<br>bivalirudin<br>and 9987<br>heparin plus<br>GP IIb/IIIa<br>inhibitors | Percutaneous<br>coronary<br>intervention<br>(PCI)  | 19,772                                               | NA                                                                          | NA                                                                                         | NA                                                                                                                                           | Not HIT                                                                                     | Mortality, Urgent<br>revascularization, Major<br>bleeding                                            |
| Olinger<br>1984 | Case<br>reports                               | Patients with<br>prior heparin-<br>dependent<br>intravascular<br>coagulation<br>who require<br>cardiopulmonary<br>bypass | Cardiac<br>catheterization                                                   | Cardiopulmonary<br>bypass                          | 3                                                    | Platelet<br>count                                                           | Not clear                                                                                  | NR                                                                                                                                           | Patients with<br>previously<br>documented<br>heparin-<br>induced<br>platelet<br>aggregation | Mortality, Intravascular<br>thrombosis or bleeding<br>diathesis,                                     |
| Pöttsch<br>2000 |                                               | Cardiopulmonary<br>Bypass<br>in Patients with<br>a History of<br>Heparin-<br>Induced                                     | Heparin<br>(unfractionated<br>heparin)                                       | Cardiopulmonary<br>Bypass                          | 10                                                   | Had<br>heparin-<br>induced<br>platelet-<br>aggregation<br>assay<br>positive | At the time<br>of surgery,<br>all patients<br>were<br>negative to<br>an antigenic<br>assay | NR                                                                                                                                           | Patients with<br>a History<br>acute HIT                                                     | No prolonged<br>thrombocytopenia,<br>Excellent recovery                                              |

| Author/<br>Year   | Study<br>Design                             | Study<br>population                                                                                                                       | Treatment                    | Procedure                                                 | Number<br>of eligible<br>patients<br>in the<br>study | Patients<br>have<br>received a<br>diagnosis of<br>HIT based<br>on---- ? | Laboratory<br>test for<br>diagnosis -                                        | For ELISA test<br>only, was<br>Optical<br>Density cut-<br>off or<br>individual OD<br>reported?<br>Y/N; if Y,<br>What was the<br>OD reported? | Type of HIT<br>(acute HIT A<br>etc)               | Outcomes: Mortality,<br>Thromboembolism,<br>Limb Amputation,<br>Major Bleeding,<br>recurrence of HIT |
|-------------------|---------------------------------------------|-------------------------------------------------------------------------------------------------------------------------------------------|------------------------------|-----------------------------------------------------------|------------------------------------------------------|-------------------------------------------------------------------------|------------------------------------------------------------------------------|----------------------------------------------------------------------------------------------------------------------------------------------|---------------------------------------------------|------------------------------------------------------------------------------------------------------|
|                   |                                             | Thrombocytopenia                                                                                                                          |                              |                                                           |                                                      |                                                                         |                                                                              |                                                                                                                                              |                                                   |                                                                                                      |
| Selleng<br>2001   | Case<br>report                              | Patient with a history of bilateral nephrectomy and HIT who needed emergency coronary artery bypass grafting.                             | heparin                      | Coronary artery bypass Surgery; Renal replacement therapy | 1                                                    | Clinically suspected                                                    | serologically proved by the heparin induced platelet activation assay (HIPA) | NR                                                                                                                                           | Patient with a history                            | No HIT-related complications, Platelet counts continuously increased, Major bleeding                 |
| Selleng<br>2008   | Case<br>report                              | Patients scheduled for heart transplantation with end-stage heart failure complicated by subacute heparin-induced thrombocytopenia (HIT). | unfractionated heparin (UFH) | Heart transplantation                                     | 3                                                    | Platelet count, anti-PF4/heparin IgG antibodies                         | EIA, but HIPA negative                                                       | OD 0.627 OD; cut-off 0.500                                                                                                                   | Acute HIT, previous HIT                           | Major bleeding, Thromboembolic complications<br>Thrombotic events                                    |
| Warkentin<br>2001 | Reviewed the medical and laboratory records | Patients with serologically confirmed heparin induced thrombocytopenia                                                                    | heparin                      | Not clear                                                 | 243                                                  | Platelet count                                                          | platelet serotonin-release assay                                             | NR                                                                                                                                           | Typical onset HIT (n=170); Rapid onset HIT (n=73) | New thrombosis, Fatal hemorrhage, Mortality within 30days after onset of HIT                         |
| Warkentin<br>2014 | Case reports                                | Cases presenting with                                                                                                                     | Aspirin, fondaparinux,       | Internal carotid                                          | 2                                                    | Platelet count                                                          | EIAs and in the SRA                                                          | < 0.40                                                                                                                                       | spontaneous HIT syndrome                          | Recovered                                                                                            |

| Author/<br>Year | Study<br>Design | Study<br>population                                                                                                                                                                                                             | Treatment                                                           | Procedure           | Number<br>of eligible<br>patients<br>in the<br>study | Patients<br>have<br>received a<br>diagnosis of<br>HIT based<br>on---- ? | Laboratory<br>test for<br>diagnosis - | For ELISA test<br>only, was<br>Optical<br>Density cut-<br>off or<br>individual OD<br>reported?<br>Y/N; if Y,<br>What was the<br>OD reported? | Type of HIT<br>(acute HIT A<br>etc)         | Outcomes: Mortality,<br>Thromboembolism,<br>Limb Amputation,<br>Major Bleeding,<br>recurrence of HIT |
|-----------------|-----------------|---------------------------------------------------------------------------------------------------------------------------------------------------------------------------------------------------------------------------------|---------------------------------------------------------------------|---------------------|------------------------------------------------------|-------------------------------------------------------------------------|---------------------------------------|----------------------------------------------------------------------------------------------------------------------------------------------|---------------------------------------------|------------------------------------------------------------------------------------------------------|
|                 |                 | thrombotic stroke/thrombocytopenia: one following shoulder hemiarthroplasty (performed without heparin) and the other presenting to the emergency room without prior hospitalization, heparin exposure, or preceding infection. | argatroban<br>warfarin;<br>heparin,<br>argatroban ,<br>fondaparinux | artery<br>terminus, |                                                      |                                                                         |                                       |                                                                                                                                              | (for acute thrombosis and thrombocytopenia) |                                                                                                      |

## 6.1 & 6.2 Renal replacement therapy for acute HIT, subacute HIT or remote HIT

1. Link A, Girndt M, Selejan S, Mathes A, Bohm M, Rensing H. Argatroban for anticoagulation in continuous renal replacement therapy. *Critical Care Medicine*. 2009;37(1):105-110.
2. Reddy BV, Grossman EJ, Trevino SA, Hursting MJ, Murray PT. Argatroban anticoagulation in patients with heparin-induced thrombocytopenia requiring renal replacement therapy. *Annals of Pharmacotherapy*. 2005;39(10):1601-1605.
3. Matsuo T, Chikahira Y, Yamada T, Nakao K, Ueshima S, Matsuo O. Effect of synthetic thrombin inhibitor (MD805) as an alternative drug on heparin induced thrombocytopenia during hemodialysis. *Thrombosis Research*. 1988;52(2):165-171.
4. Yamamoto S, Koide M, Matsuo M, et al. Heparin-induced thrombocytopenia in hemodialysis patients. *American journal of kidney diseases*. 1996;28(1):82-85.
5. Williamson DR, Boulanger I, Tardif M, Albert M, Gregoire G. Argatroban Dosing in Intensive Care Patients with Acute Renal Failure and Liver Dysfunction. *Pharmacotherapy*. 2004;24(3):409-414.
6. Matsuo T, Kario K, Chikahira Y, Nakao K, Yamada T. Treatment of heparin-induced thrombocytopenia by use of argatroban, a synthetic thrombin inhibitor. *British Journal of Haematology*. 1992;82(3):627-629.
7. Koide M, Yamamoto S, Matsuo M, Suzuki S, Arima N, Matsuo T. Anticoagulation for heparin-induced thrombocytopenia with spontaneous platelet aggregation in a patient requiring haemodialysis. *Nephrology Dialysis Transplantation*. 1995;10(11):2137-2140.
8. Alatri A, Foramitti M, Paoletti O, Zimmermann A, Testa S. Treatment with argatroban in one haemodialysed patient with a heparin-induced thrombocytopenia and thrombotic complications. *Internal and Emergency Medicine*. 2010;5(4):359-360.
9. Athar U, Husain J, Hudson J, Lynch J, Gajra A. Prolonged half-life of Argatroban in patients with renal dysfunction and antiphospholipid antibody syndrome being treated for heparin-induced thrombocytopenia. *American Journal of Hematology*. 2008;83(3):245-246.
10. Barginear MF, Donahue L, Allen SL, et al. Heparin-induced thrombocytopenia complicating hemodialysis. *Clinical and Applied Thrombosis/Hemostasis*. 2008;14(1):105-107.
11. De Pont A-CJ, Hofstra J-JH, Pik DR, Meijers JC, Schultz MJ. Pharmacokinetics and pharmacodynamics of danaparoid during continuous venovenous hemofiltration: a pilot study. *Critical Care*. 2007;11(5):R102.
12. Magnani HN. A review of 122 published outcomes of danaparoid anticoagulation for intermittent haemodialysis. *Thrombosis Research*. 2010;125(4):e171-e176.
13. Lindhoff-Last E, Betz C, Bauersachs R. Use of a low-molecular-weight heparinoid (danaparoid sodium) for continuous renal replacement therapy in intensive care patients. *Clinical and Applied Thrombosis/Hemostasis*. 2001;7(4):300-304.
14. Zerbi S, Manfrini V, Castellano A, Pezzotta M, Ruggiero P, Pedrini LA. Use of fondaparinux for extracorporeal circuit anticoagulation in patients with heparin-induced thrombocytopenia type II (HIT II) on haemodiafiltration (HDF). *Nephrology Dialysis Transplantation*. 2015;30:iii236.
15. Haase M, Bellomo R, Rocktaeschel J, et al. Use of fondaparinux (ARIXTRA) in a dialysis patient with symptomatic heparin-induced thrombocytopenia type II. *Nephrology Dialysis Transplantation*. 2005;20(2):444-446.



16. Brown P, Jay R, Fox A, Oliver M. Chronic fondaparinux use in a hemodialysis patient with heparin-induced thrombocytopenia type II and extracorporeal circuit thrombosis-A case report and review of the literature. *Hemodialysis International*. 2013;17(3):444-449.
17. Al-Ali FS, Elsayed M, Khalifa S, et al. Successful use of a bivalirudin treatment protocol to prevent extracorporeal thrombosis in ambulatory hemodialysis patients with heparin-induced thrombocytopenia. *Hemodialysis International*. 2016;20(2):204-207.
18. Joseph L, Casanegra AI, Dhariwal M, et al. Bivalirudin for the treatment of patients with confirmed or suspected heparin-induced thrombocytopenia. *Journal of Thrombosis and Haemostasis*. 2014;12(7):1044-1053.
19. Ng HJ, Than H, Teo EC. First experiences with the use of rivaroxaban in the treatment of heparin-induced thrombocytopenia. *Thrombosis Research*. 2015;135(1):205-207.
20. Kommalapati A, Kallam A, Krishnamurthy J, Tella SH, Koppala J, Tandra PK. Upper Limb Phlegmasia Cerulea Dolens Secondary to Heparin-induced Thrombocytopenia Leading to Gangrene. *Cureus*. 2018;10(6):e2853.
21. Trujillo Agudelo D, Ramirez Quintero JD, Arango Barrientos M. Successful treatment of heparin-induced thrombocytopenia with apixaban in a patient with chronic kidney disease requiring hemodialysis. *Clinical Case Reports*. 2018;6(11):2147-9.

#### Characteristics of included studies

| Author/<br>Year | Study<br>Design | Study<br>population                                                 | Treatment   | Procedure                      | Number<br>of<br>eligible<br>patients<br>in the<br>study | Patients<br>have<br>received a<br>diagnosis<br>of HIT<br>based on-<br>--- ? | Laboratory test<br>for diagnosis -                           | For ELISA<br>test only,<br>was Optical<br>Density cut-<br>off or<br>individual<br>OD<br>reported?<br>Y/N; if Y,<br>What was<br>the OD<br>reported? | Type of HIT<br>(acute HIT A<br>etc) | Outcomes:<br>Mortality,<br>Thromboembolis<br>m, Limb<br>Amputation,<br>Major Bleeding,<br>recurrence of HIT |
|-----------------|-----------------|---------------------------------------------------------------------|-------------|--------------------------------|---------------------------------------------------------|-----------------------------------------------------------------------------|--------------------------------------------------------------|----------------------------------------------------------------------------------------------------------------------------------------------------|-------------------------------------|-------------------------------------------------------------------------------------------------------------|
| Al-Ali 2016     | Case<br>reports | Patients<br>diagnosed<br>with HIT                                   | Bivalirudin | Ambulatory<br>hemodialysi<br>s | 8                                                       | Platelet<br>count                                                           | Immunological<br>gel diffusion<br>assay for<br>HPF4 antibody | NR                                                                                                                                                 | Acute HIT                           | Recurrence of<br>extracorporeal<br>thrombosis (ECT)<br>events                                               |
| Alatri 2010     | Case<br>report  | A 83-year-<br>old woman<br>with chronic<br>renal failure<br>started | Argatroban  | Haemodialy<br>sis              | 1                                                       | PF4                                                                         | ELISA                                                        | OD 2.77;<br>normal<br>value< 0.40                                                                                                                  | HIT patient                         | thrombotic<br>complication                                                                                  |

| Author/<br>Year | Study<br>Design | Study<br>population                                                                                                                                                                                                  | Treatment  | Procedure                 | Number<br>of<br>eligible<br>patients<br>in the<br>study | Patients<br>have<br>received a<br>diagnosis<br>of HIT<br>based on-<br>--- ? | Laboratory test<br>for diagnosis - | For ELISA<br>test only,<br>was Optical<br>Density cut-<br>off or<br>individual<br>OD<br>reported?<br>Y/N; if Y,<br>What was<br>the OD<br>reported? | Type of HIT<br>(acute HIT A<br>etc) | Outcomes:<br>Mortality,<br>Thromboembolis<br>m, Limb<br>Amputation,<br>Major Bleeding,<br>recurrence of HIT |
|-----------------|-----------------|----------------------------------------------------------------------------------------------------------------------------------------------------------------------------------------------------------------------|------------|---------------------------|---------------------------------------------------------|-----------------------------------------------------------------------------|------------------------------------|----------------------------------------------------------------------------------------------------------------------------------------------------|-------------------------------------|-------------------------------------------------------------------------------------------------------------|
|                 |                 | haemodialysis because of worsening of renal function                                                                                                                                                                 |            |                           |                                                         |                                                                             |                                    |                                                                                                                                                    |                                     |                                                                                                             |
| Athar 2008      | Case report     | A 49-year-old female patient with systemic lupus erythematosus, antiphospholipid syndrome, end-stage renal disease maintained on peritoneal dialysis and on long-term anticoagulation with warfarin for a prosthetic | Argatroban | Renal replacement therapy | 1                                                       | Platelet count                                                              | ELISA                              | NR                                                                                                                                                 | HIT Type II                         | Thrombotic complication , Discharge home                                                                    |
| Barginear 2008  | Case report     | A 25-year-old female with a                                                                                                                                                                                          | Argatroban | Haemodialysis             | 1                                                       | Platelet count, PF4                                                         | ELISA                              | 0.828                                                                                                                                              | Acute HIT                           | Patient's platelets rose                                                                                    |

| Author/<br>Year | Study<br>Design | Study<br>population                                                                                                                                                                                                  | Treatment        | Procedure        | Number<br>of<br>eligible<br>patients<br>in the<br>study | Patients<br>have<br>received a<br>diagnosis<br>of HIT<br>based on-<br>--- ? | Laboratory test<br>for diagnosis - | For ELISA<br>test only,<br>was Optical<br>Density cut-<br>off or<br>individual<br>OD<br>reported?<br>Y/N; if Y,<br>What was<br>the OD<br>reported? | Type of HIT<br>(acute HIT A<br>etc) | Outcomes:<br>Mortality,<br>Thromboembolis<br>m, Limb<br>Amputation,<br>Major Bleeding,<br>recurrence of HIT |
|-----------------|-----------------|----------------------------------------------------------------------------------------------------------------------------------------------------------------------------------------------------------------------|------------------|------------------|---------------------------------------------------------|-----------------------------------------------------------------------------|------------------------------------|----------------------------------------------------------------------------------------------------------------------------------------------------|-------------------------------------|-------------------------------------------------------------------------------------------------------------|
|                 |                 | history of<br>end-stage<br>renal disease<br>due to<br>interstitial<br>nephritis,<br>tertiary<br>hyperparath<br>yroidism,<br>and<br>calciphylaxis<br>was started<br>on<br>hemodialysis                                |                  |                  |                                                         |                                                                             |                                    |                                                                                                                                                    |                                     |                                                                                                             |
| Brown<br>2013   | Case<br>report  | 88-year-old<br>man newly<br>initiated on<br>high-flux<br>hemodialysis<br>who<br>developed<br>HIT and<br>extracorpore<br>al circuit<br>thrombosis<br>after 3<br>weeks of<br>exposure to<br>unfractionat<br>ed heparin | Fondaparin<br>ux | Hemodialysi<br>s | 1                                                       | Platelet<br>count                                                           | ELISA, C-SRA                       | 1.256                                                                                                                                              | HIT II                              | Complications                                                                                               |

| Author/<br>Year | Study<br>Design                                                                                | Study<br>population                                                                                                                                                                            | Treatment        | Procedure                                     | Number<br>of<br>eligible<br>patients<br>in the<br>study | Patients<br>have<br>received a<br>diagnosis<br>of HIT<br>based on-<br>--- ? | Laboratory test<br>for diagnosis -                                                                            | For ELISA<br>test only,<br>was Optical<br>Density cut-<br>off or<br>individual<br>OD<br>reported?<br>Y/N; if Y,<br>What was<br>the OD<br>reported? | Type of HIT<br>(acute HIT A<br>etc)                                 | Outcomes:<br>Mortality,<br>Thromboembolism, Limb<br>Amputation,<br>Major Bleeding,<br>recurrence of HIT        |
|-----------------|------------------------------------------------------------------------------------------------|------------------------------------------------------------------------------------------------------------------------------------------------------------------------------------------------|------------------|-----------------------------------------------|---------------------------------------------------------|-----------------------------------------------------------------------------|---------------------------------------------------------------------------------------------------------------|----------------------------------------------------------------------------------------------------------------------------------------------------|---------------------------------------------------------------------|----------------------------------------------------------------------------------------------------------------|
| De Pont<br>2007 | A<br>Mathema<br>tical<br>model/ a<br>cohort of<br>five<br>patients<br>with<br>suspected<br>HIT | Patients with<br>acute renal<br>failure,<br>especially in<br>patients'<br>dependent<br>on renal<br>replacement<br>therapy such<br>as<br>continuous<br>venovenous<br>hemofiltratio<br>n (CVVH). | Danaparoid       | Hemofiltrati<br>on                            | 5                                                       | NA                                                                          | NA                                                                                                            | NA                                                                                                                                                 | Suspected HIT                                                       | Bleeding,<br>Thromboembolic<br>events                                                                          |
| Haase 2005      | Case<br>report                                                                                 | A 52-year-<br>old renal<br>transplant<br>patient (80<br>kg) with pain<br>in his left<br>lower<br>abdomen<br>and groin,<br>and a<br>weakness of<br>his left leg                                 | Fondaparin<br>ux | Dialysis                                      | 1                                                       | Platelet<br>count                                                           | Serological tests<br>for HIT II were<br>repeatedly<br>negative,<br>clinically<br>diagnosed HIT II<br>syndrome | NR                                                                                                                                                 | Symptomatic<br>heparin-<br>induced<br>thrombocytopa<br>enia type II | Thromboembolis<br>ms, Clotting of<br>blood inside the<br>haemodialysis<br>membranes<br>or bleeding<br>occurred |
| Joseph<br>2014  | Retrospec<br>tive<br>review                                                                    | Consecutive<br>patient who<br>received<br>bivalirudin                                                                                                                                          | Bivalirudin      | 109 (23.6%)<br>were<br>dialysis-<br>dependent | 109                                                     | PF4                                                                         | ELISA, HIPA or<br>SRA                                                                                         | ≥ 0.400                                                                                                                                            | (11 Remote HIT,<br>69 suspected<br>HIT, 29<br>Confirmed HIT)        | Mortality , New<br>thrombosis,<br>Amputation,<br>Major bleeding                                                |

| Author/<br>Year      | Study<br>Design | Study<br>population                                                                                                               | Treatment                             | Procedure                                       | Number<br>of<br>eligible<br>patients<br>in the<br>study | Patients<br>have<br>received a<br>diagnosis<br>of HIT<br>based on-<br>--- ? | Laboratory test<br>for diagnosis -                                                                                 | For ELISA<br>test only,<br>was Optical<br>Density cut-<br>off or<br>individual<br>OD<br>reported?<br>Y/N; if Y,<br>What was<br>the OD<br>reported? | Type of HIT<br>(acute HIT A<br>etc) | Outcomes:<br>Mortality,<br>Thromboembolis<br>m, Limb<br>Amputation,<br>Major Bleeding,<br>recurrence of HIT                                                                                                                                                                      |
|----------------------|-----------------|-----------------------------------------------------------------------------------------------------------------------------------|---------------------------------------|-------------------------------------------------|---------------------------------------------------------|-----------------------------------------------------------------------------|--------------------------------------------------------------------------------------------------------------------|----------------------------------------------------------------------------------------------------------------------------------------------------|-------------------------------------|----------------------------------------------------------------------------------------------------------------------------------------------------------------------------------------------------------------------------------------------------------------------------------|
|                      |                 | for a<br>suspected,<br>confirmed or<br>previous<br>history of<br>HIT                                                              |                                       |                                                 |                                                         |                                                                             |                                                                                                                    |                                                                                                                                                    |                                     |                                                                                                                                                                                                                                                                                  |
| Koide 1995           | Case<br>report  | A 74-year-<br>old woman<br>had diabetes<br>mellitus had<br>uraemia<br>symptoms                                                    | Heparin<br>and aspirin,<br>Argatroban | Haemodialy<br>sis                               | 1                                                       | Platelet<br>count, PF<br>4                                                  | Heparin-<br>induced platelet<br>aggregation test<br>and<br>ELISA                                                   | NR                                                                                                                                                 | Acute HIT                           | Bleeding<br>complication,<br>clot formation                                                                                                                                                                                                                                      |
| Kommalap<br>ati 2018 | Case<br>report  | 88-year-old<br>man with<br>sepsis<br>clinical<br>manifestatio<br>n and<br>hemodialysis<br>for past<br>three<br>months for<br>ESRD | Argatroban                            | Sepsis in the<br>setting of<br>hemodialysi<br>s | 1                                                       | Drop in Plt<br>count, 4T,                                                   | heparin-platelet<br>factor 4(PF4)<br>antibodies,<br>heparin<br>inhibition,<br>serotonin<br>release assays<br>ELISA | NR                                                                                                                                                 | Acute HIT                           | On day eight,<br>venous duplex<br>demonstrated<br>normal<br>compressibility<br>and spontaneous<br>flow in the vein<br>of the right upper<br>extremity.<br>Platelet count<br>recovery, no<br>further<br>thrombotic<br>complications,<br>second and third<br>fingers<br>amputated. |

| Author/<br>Year        | Study<br>Design                           | Study<br>population                                                                                                                                                                     | Treatment               | Procedure                                               | Number<br>of<br>eligible<br>patients<br>in the<br>study | Patients<br>have<br>received a<br>diagnosis<br>of HIT<br>based on<br>--- ? | Laboratory test<br>for diagnosis -              | For ELISA<br>test only,<br>was Optical<br>Density cut-<br>off or<br>individual<br>OD<br>reported?<br>Y/N; if Y,<br>What was<br>the OD<br>reported? | Type of HIT<br>(acute HIT A<br>etc)                                             | Outcomes:<br>Mortality,<br>Thromboembolis<br>m, Limb<br>Amputation,<br>Major Bleeding,<br>recurrence of HIT |
|------------------------|-------------------------------------------|-----------------------------------------------------------------------------------------------------------------------------------------------------------------------------------------|-------------------------|---------------------------------------------------------|---------------------------------------------------------|----------------------------------------------------------------------------|-------------------------------------------------|----------------------------------------------------------------------------------------------------------------------------------------------------|---------------------------------------------------------------------------------|-------------------------------------------------------------------------------------------------------------|
| Lindhoff-<br>Last 2001 | Retrospec<br>tive<br>analysis<br>of       | Critically ill<br>patients with<br>acute renal<br>failure and<br>suspected<br>heparin-<br>induced<br>thrombocyto<br>penia (HIT)<br>needing<br>renal<br>replacement<br>therapy<br>(RRT). | Danaparoid              | Renal<br>Replacemen<br>t Therapy                        | 13                                                      | Platelet<br>count and                                                      | Positive<br>heparin-<br>induced<br>antibodies   | NR                                                                                                                                                 | HIT patients = 2;<br>Non-HIT = 11                                               | Mortality,<br>Thromboembolic<br>complications                                                               |
| Link 2009              | Prospecti<br>ve, dose<br>finding<br>study | Medical and<br>surgical with<br>acute or<br>histories of<br>heparin-<br>induced<br>thrombocyto<br>penia type II<br>and acute<br>renal failure<br>with<br>necessity for<br>CRRT.         | CRRT with<br>argatroban | Continuous<br>renal<br>replacement<br>therapy<br>(CRRT) | 30                                                      | Platelet<br>count                                                          | The enzyme-<br>linked<br>immunosorbent<br>assay | NR                                                                                                                                                 | Acute or<br>histories of<br>heparin-<br>induced<br>thrombocyto<br>penia type II | Minor bleeding,<br>Severe bleeding<br>episodes,                                                             |
| Magnani<br>2010        | Systemati<br>c review/                    | In severely ill<br>patients with<br>heparin                                                                                                                                             | Danaparoid              | Intermittent<br>haemodialys<br>is                       | 122                                                     | 4T pre-<br>test<br>scores                                                  | Functional<br>serological test                  | NR                                                                                                                                                 | HIT patients                                                                    | Mortality, Major<br>bleeding, Serious<br>adverse event:                                                     |

| Author/<br>Year | Study<br>Design     | Study<br>population                                                                                                                                                              | Treatment                                | Procedure                                           | Number<br>of<br>eligible<br>patients<br>in the<br>study | Patients<br>have<br>received a<br>diagnosis<br>of HIT<br>based on-<br>--- ? | Laboratory test<br>for diagnosis - | For ELISA<br>test only,<br>was Optical<br>Density cut-<br>off or<br>individual<br>OD<br>reported?<br>Y/N; if Y,<br>What was<br>the OD<br>reported? | Type of HIT<br>(acute HIT A<br>etc) | Outcomes:<br>Mortality,<br>Thromboembolis<br>m, Limb<br>Amputation,<br>Major Bleeding,<br>recurrence of HIT |
|-----------------|---------------------|----------------------------------------------------------------------------------------------------------------------------------------------------------------------------------|------------------------------------------|-----------------------------------------------------|---------------------------------------------------------|-----------------------------------------------------------------------------|------------------------------------|----------------------------------------------------------------------------------------------------------------------------------------------------|-------------------------------------|-------------------------------------------------------------------------------------------------------------|
|                 | 122 case<br>reports | intolerance<br>for<br>intermittent<br>haemodialysi<br>s (HD)                                                                                                                     |                                          |                                                     |                                                         |                                                                             |                                    |                                                                                                                                                    |                                     |                                                                                                             |
| Matsuo<br>1988  | Case<br>reports     | Patients with<br>acute renal<br>failure who<br>were given<br>continuous<br>infusions of<br>heparin<br>during<br>hemodialysis<br>by use of a<br>hollow fiber<br>type<br>dialyzer. | MD805<br>(Mitsubishi<br>Chemical<br>Co.) | Hemodialysi<br>s                                    | 5                                                       | Platelet<br>count                                                           | ELISA assay                        | NR                                                                                                                                                 | Acute HIT                           | PBIgG level,<br>Preventing clot<br>formation                                                                |
| Matsuo<br>1992  | Case<br>report      | <b>A</b> 78-year-<br>old woman<br>had suffered<br>from non-<br>insulin<br>dependent<br>diabetes <b>and</b><br>admitted for<br>the<br>treatment of<br>azotaemia<br>by             | UFH,<br>LMWH,<br>Argatroban              | Haemodialy<br>sis using<br>hollow fibre<br>dialyser | 1                                                       | Platelet<br>count                                                           | Not clear                          | NR                                                                                                                                                 | Not HIT                             | clotting or<br>thrombocytopeni<br>a occurred during<br>haemodialysis                                        |

| Author/<br>Year | Study<br>Design                | Study<br>population                                                                                                                 | Treatment              | Procedure                       | Number<br>of<br>eligible<br>patients<br>in the<br>study | Patients<br>have<br>received a<br>diagnosis<br>of HIT<br>based on<br>--- ? | Laboratory test<br>for diagnosis - | For ELISA<br>test only,<br>was Optical<br>Density cut-<br>off or<br>individual<br>OD<br>reported?<br>Y/N; if Y,<br>What was<br>the OD<br>reported? | Type of HIT<br>(acute HIT A<br>etc)                                                  | Outcomes:<br>Mortality,<br>Thromboembolism, Limb<br>Amputation,<br>Major Bleeding,<br>recurrence of HIT |
|-----------------|--------------------------------|-------------------------------------------------------------------------------------------------------------------------------------|------------------------|---------------------------------|---------------------------------------------------------|----------------------------------------------------------------------------|------------------------------------|----------------------------------------------------------------------------------------------------------------------------------------------------|--------------------------------------------------------------------------------------|---------------------------------------------------------------------------------------------------------|
|                 |                                | haemodialysis                                                                                                                       |                        |                                 |                                                         |                                                                            |                                    |                                                                                                                                                    |                                                                                      |                                                                                                         |
| Ng 2015         | Case reports                   | 63-year-old woman with end stage renal failure, 2 Surgery patients                                                                  | Rivaroxaban            | Haemodialysis                   | 3                                                       | platelet count                                                             | HPIA                               | OD reading – 3.20, positive cut-off value – 0.497                                                                                                  | Acute HIT                                                                            | recurrent thrombotic or bleeding complications                                                          |
| Reddy 2005      | Retrospective records reviewed | Patients with HIT and renal failure requiring RRT who were identified from the prospective multicenter studies of argatroban in HIT | Argatroban             | Renal replacement therapy (RRT) | 47                                                      | Platelet count                                                             | NR                                 | NR                                                                                                                                                 | Had HIT with or without thrombosis (or a history of HIT and required anticoagulation | Mortality, Amputation, New thrombosis, Major bleeding                                                   |
| Trujillo 2018   | Case report                    | 71- year- old former smoker with a previous history of hypertension , hypothyroidism, CKD,                                          | Fondaparinux, Apixaban |                                 | 1                                                       | Drop in Plt count, 4T,                                                     | 4Ts score and 4 antiplatelet aAB   | NR                                                                                                                                                 | Acute HITT                                                                           | Amputation, multiple thrombotic events, After Apixaban no thrombotic episodes, kidney function improved |



| Author/<br>Year    | Study<br>Design              | Study<br>population                                                                                                                                                                                                                                      | Treatment  | Procedure                                     | Number<br>of<br>eligible<br>patients<br>in the<br>study | Patients<br>have<br>received a<br>diagnosis<br>of HIT<br>based on-<br>--- ? | Laboratory test<br>for diagnosis -      | For ELISA<br>test only,<br>was Optical<br>Density cut-<br>off or<br>individual<br>OD<br>reported?<br>Y/N; if Y,<br>What was<br>the OD<br>reported? | Type of HIT<br>(acute HIT A<br>etc) | Outcomes:<br>Mortality,<br>Thromboembolism, Limb<br>Amputation,<br>Major Bleeding,<br>recurrence of HIT |
|--------------------|------------------------------|----------------------------------------------------------------------------------------------------------------------------------------------------------------------------------------------------------------------------------------------------------|------------|-----------------------------------------------|---------------------------------------------------------|-----------------------------------------------------------------------------|-----------------------------------------|----------------------------------------------------------------------------------------------------------------------------------------------------|-------------------------------------|---------------------------------------------------------------------------------------------------------|
|                    |                              | psoriasis,<br>and primary<br>myelofibrosis<br>with<br>arterial<br>thrombosis                                                                                                                                                                             |            |                                               |                                                         |                                                                             |                                         |                                                                                                                                                    |                                     | Hemodialysis<br>was suspended.<br>No hemorrhagic<br>complications                                       |
| Williamson<br>2004 | Case<br>reports              | Consecutive<br>patients with<br>proven<br>heparin-<br>induced<br>thrombocyto-<br>penia (HIT),<br>acute renal<br>failure<br>requiring<br>continuous<br>renal<br>replacement<br>therapy, and<br>various<br>levels of<br>transient<br>hepatic<br>impairment | Argatroban | Continuous<br>renal<br>replacement<br>therapy | 4                                                       | Not clear                                                                   | Not clear                               | NR                                                                                                                                                 | Suspected HIT,<br>diagnosed HIT     | Bleeding or<br>thrombotic<br>complications                                                              |
| Yamamoto<br>1996   | Cross-<br>sectional<br>study | Consecutive<br>patients<br>were newly<br>treated with<br>hemodialysis                                                                                                                                                                                    | Heparin    | Hemodialysis                                  | 154                                                     | PF4                                                                         | Enzyme-linked<br>immunosorbent<br>assay | NR                                                                                                                                                 | 6 HIT type II;<br>148 non-HIT       | Clot Formation<br>during<br>hemodialysis                                                                |

| Author/<br>Year | Study<br>Design                                          | Study<br>population                                                                                            | Treatment    | Procedure                   | Number<br>of<br>eligible<br>patients<br>in the<br>study | Patients<br>have<br>received a<br>diagnosis<br>of HIT<br>based on-<br>--- ? | Laboratory test<br>for diagnosis - | For ELISA<br>test only,<br>was Optical<br>Density cut-<br>off or<br>individual<br>OD<br>reported?<br>Y/N; if Y,<br>What was<br>the OD<br>reported? | Type of HIT<br>(acute HIT A<br>etc) | Outcomes:<br>Mortality,<br>Thromboembolism, Limb<br>Amputation,<br>Major Bleeding,<br>recurrence of HIT |
|-----------------|----------------------------------------------------------|----------------------------------------------------------------------------------------------------------------|--------------|-----------------------------|---------------------------------------------------------|-----------------------------------------------------------------------------|------------------------------------|----------------------------------------------------------------------------------------------------------------------------------------------------|-------------------------------------|---------------------------------------------------------------------------------------------------------|
|                 |                                                          | due to<br>chronic or<br>acute renal<br>failure.                                                                |              |                             |                                                         |                                                                             |                                    |                                                                                                                                                    |                                     |                                                                                                         |
| Zerbi 2015      | Prospective<br>observational<br>dose<br>finding<br>study | Patients who<br>developed<br>HIT II after<br>start of twice<br>weekly<br>chronic<br>dialysis with<br>mixed HDF | Fondaparinux | Haemodiafiltration<br>(HDF) | 7                                                       | Not clear                                                                   | Not clear                          | NR                                                                                                                                                 | HIT type II                         | No clotting,<br>Bleeding, Side<br>effects                                                               |

## 7. VTE prophylaxis in patients with Remote HIT

1. Warkentin, T. E. and J. G. Kelton (2001). "Temporal aspects of heparin-induced thrombocytopenia." New England Journal of Medicine **344**(17): 1286-1292.

| Author/ Year   | Study Design                   | Study population                     | Treatment             | Procedure | Number of eligible patients in the study | Patients have received a diagnosis of HIT based on --- ?               | Laboratory test for diagnosis - | For ELISA test only, was Optical Density cut-off or individual OD reported? Y/N; if Y, What was the OD reported? | Type of HIT (acute HIT A etc) | Outcomes: Mortality, Thromboembolism, Limb Amputation, Major Bleeding, recurrence of HIT |
|----------------|--------------------------------|--------------------------------------|-----------------------|-----------|------------------------------------------|------------------------------------------------------------------------|---------------------------------|------------------------------------------------------------------------------------------------------------------|-------------------------------|------------------------------------------------------------------------------------------|
| Warkentin 2001 | Single arm observational study | Cardiac surgery and vascular surgery | Heparin for 8-19 days | N/A       | 3                                        | Serologic confirmed remote HIT, No thrombocytopenia, or seroconversion | Not reported                    | Not reported                                                                                                     | Remote HIT                    | No thrombosis, no thrombocytopenia,                                                      |

## 8.1. & 8.2. Emergency identification for persons with HIT

1. Gorlin, J., et al. (2011). "Use of emergency medical identification in the paediatric haemophilia population: a national study." *Haemophilia* **17**(2): 215-222.

| Author/ Year | Study Design                   | Study population       | Treatment                                                 | Procedure | Number of eligible patients in the study | Patients have received a diagnosis of HIT based on --- ? | Laboratory test for diagnosis - | For ELISA test only, was Optical Density cut-off or individual OD reported? Y/N; if Y, What was the OD reported? | Type of HIT (acute HIT A etc) | Outcomes: Mortality, Thromboembolism, Limb Amputation, Major Bleeding, recurrence of HIT |
|--------------|--------------------------------|------------------------|-----------------------------------------------------------|-----------|------------------------------------------|----------------------------------------------------------|---------------------------------|------------------------------------------------------------------------------------------------------------------|-------------------------------|------------------------------------------------------------------------------------------|
| Gorlin 2011  | Single arm observational study | Pediatric hemophiliacs | emergency medical identification (EMI) such as MedicAlert | NA        | 97 nurses                                | NA                                                       | NA                              | NA                                                                                                               | NA                            | Adverse reactions from wearing an emergency medical identification device                |
